1  
2  
3  
4  
5  
6  
7  
8  
9  
10  
11  
12  
13  
14  
15  
16  
17  
18  
19  
20

**Spt5 phosphorylation and the Rtf1 Plus3 domain promote Rtf1 function through distinct mechanisms**

Jennifer J. Chen<sup>1</sup>, Jean Mbogning<sup>1</sup>, Mark A. Hancock<sup>1,2</sup>, Dorsa Majdpour<sup>1</sup>, Manan Madhok<sup>1</sup>, Hassan Nassour<sup>3</sup>, Juliana C. Dallagnol<sup>3</sup>, Viviane Pagé<sup>1</sup>, David Chatenet<sup>3</sup>, and Jason C. Tanny<sup>1\*</sup>

<sup>1</sup>Department of Pharmacology and Therapeutics, McGill University, Montreal, Canada

<sup>2</sup>McGill SPR-MS Facility, McGill University, Montreal, Canada

<sup>3</sup>INRS - Centre Armand-Frappier, Groupe de Recherche en Ingénierie des Peptides et en Pharmacothérapie (GRIPP), Ville de Laval, Canada

\*Corresponding author: [jason.tanny@mcgill.ca](mailto:jason.tanny@mcgill.ca)

21  
22  
23  
24  
25  
26  
27  
28  
29  
30  
31  
32  
33  
34  
35  
36  
37  
38  
39  
40

## Abstract

Rtf1 is a conserved RNA polymerase II (RNAPII) elongation factor that promotes co-transcriptional histone modification, RNAPII transcript elongation, and mRNA processing. Rtf1 function requires phosphorylation of Spt5, an essential RNAPII processivity factor. Spt5 is phosphorylated within its C-terminal domain (CTD) by cyclin-dependent kinase 9 (Cdk9), catalytic component of positive transcription elongation factor b (P-TEFb). Rtf1 recognizes phosphorylated Spt5 (pSpt5) through its Plus3 domain. Since Spt5 is a unique target of Cdk9, and Rtf1 is the only known pSpt5-binding factor, the Plus3/pSpt5 interaction is thought to be a key Cdk9-dependent event regulating RNAPII elongation. Here we dissect Rtf1 regulation by pSpt5 in the fission yeast *Schizosaccharomyces pombe*. We demonstrate that the Plus3 domain of Rtf1 (Prf1 in *S. pombe*) and pSpt5 are functionally distinct, and that they act in parallel to promote Prf1 function. This alternate Plus3 domain function involves an interface that overlaps with the pSpt5 binding site and that can interact with single-stranded nucleic acid or with the Polymerase Associated Factor (PAF) Complex *in vitro*. We further show that the C-terminal region of Prf1, which also interacts with PAF, has a similar parallel function with pSpt5. Our results elucidate unexpected complexity underlying Cdk9-dependent pathways that regulate transcription elongation.

41

## 42 **Introduction**

43

44 Mechanisms regulating RNAPII transcription elongation are potential therapeutic targets in  
45 cancer, heart disease, and pathogenesis of HIV (1-3). Although a number of conserved positive  
46 and negative regulators of elongation have been identified, their mechanisms of action remain  
47 poorly understood (4,5). Rtf1 is a multi-functional elongation factor primarily implicated in  
48 promoting co-transcriptional histone modifications; it also has roles in RNAPII elongation and  
49 mRNA processing (4,6,7). Rtf1 is functionally linked to Cdk9, the catalytic component of P-  
50 TEFb and key driver of RNAPII elongation in all eukaryotes (4). The most extensively  
51 characterized Cdk9 targets are Rpb1, the largest subunit of RNAPII, and Spt5, an essential  
52 RNAPII processivity factor, both of which are phosphorylated on repeated amino acid motifs  
53 that comprise their C-terminal domains (CTDs)(8,9). The Spt5 CTD repeat is more variable than  
54 that of Rpb1 CTD in size and sequence, both within and between species. A related repeat motif  
55 is conserved between *S. pombe* (consensus motif: TPAWNSKS) and human [consensus motif:  
56 TP(M/L)YGS(R/Q)], in which the Thr1 residue is the Cdk9 target (10-12). The roles of the Spt5  
57 CTD and its phosphorylation in RNAPII elongation are mostly unknown, despite the fact that it  
58 is a primary and exclusive Cdk9 target both *in vitro* and *in vivo* (8-10,13). In fact, the only  
59 established function of phosphorylated Spt5-T1 (pSpt5) is to create a binding site for Rtf1 (Prf1  
60 in *S. pombe*)(14-16). Rtf1 recognizes pSpt5 through its conserved Plus3 domain, so named for  
61 three positively charged amino acids that are invariant among Rtf1 orthologs (17,18). The Plus3  
62 domain is essential for the localization of Rtf1 to transcribed genes (14,17). Rtf1 also contains a  
63 highly conserved histone modification domain (HMD). The HMD directly stimulates activity of  
64 the E2 ubiquitin conjugating enzyme Rad6, leading to the mono-ubiquitylation of histone H2B  
65 (H2Bub1)(19,20). H2Bub1, in turn, directly promotes the activity of the histone H3K79  
66 methyltransferase Dot1, as well as the Set1 histone H3K4 methyltransferase complex, and  
67 regulates chromatin dynamics during transcription (21-23). The C-terminal domain of Rtf1  
68 interacts with the Polymerase Associated Factor (PAF) complex; this domain in human Rtf1 also  
69 stimulates RNAPII elongation *in vitro* (17,24,25). Therefore, Rtf1 Plus3 domain interaction with  
70 pSpt5 is thought to be part of a key regulatory pathway linking Cdk9 activity to co-  
71 transcriptional histone modification.

72

73 A crystal structure of the Plus3 domain in complex with phosphorylated Spt5 CTD has provided  
74 a high-resolution view of this interaction, and mutations that eliminate or decrease the interaction  
75 between the Plus3 domain and pSpt5 abrogate Rtf1 association with transcribed genes *in vivo*  
76 (15). Similarly, Spt5 CTD mutations that eliminate the Cdk9-dependent phosphorylation site also  
77 prevent the association of Rtf1 with chromatin and diminish H2Bub1 levels (14,16,26,27),  
78 consistent with pSpt5 recognition by Plus3 domain playing a central role in Rtf1 function.  
79 However, the Plus3 domain has also been shown to have other functions. For example, Plus3  
80 contains a subdomain with structural similarity to the nucleic acid-binding PAZ domains found  
81 in Argonaute family proteins (18,28). The Plus3 domain has been shown to interact with single-  
82 stranded DNA (ssDNA) *in vitro*. The physiological significance of the nucleic acid interaction is  
83 not understood, nor is the relationship between pSpt5 binding and nucleic acid binding. Previous  
84 biochemical studies argue that these two functions are likely to be separable, although this has  
85 not been formally tested (18,28). In the fission yeast *S. pombe*, genetic ablation of H2Bub1 or of  
86 the Rtf1 ortholog Prf1 cause cell division and morphology phenotypes that are not caused by

87 Spt5-T1 mutations (13,16,29,30). These data call into question the idea of a simple, linear  
88 pathway connecting Cdk9 activity to H2Bub1 through Plus3 domain binding to pSpt5.  
89

90 We have used the model eukaryote *S. pombe* to evaluate the physiological significance of the  
91 putative Cdk9-Spt5-Prf1 pathway. Surprisingly, our data suggests that both pSpt5 and the Prf1  
92 Plus3 domain act independently to mediate Prf1 function in elongation. The additional Plus3  
93 domain interaction involves an interface that overlaps the pSpt5 binding site, is necessary for  
94 Prf1 chromatin association, and shares function with a C-terminal region of Prf1 that interacts  
95 with the PAF complex. Our results suggest that recruitment of Prf1/Rtf1 to sites of transcription  
96 involves multiple interactions that are modulated both directly and indirectly by Cdk9-dependent  
97 Spt5 phosphorylation.  
98

## 99 **Materials and Methods:**

100 **Yeast strains.** *S. pombe* strains used in this study are listed in Table S1. All genetic  
101 manipulations were conducted using standard techniques as previously described (31). Standard  
102 YES media (5g/L yeast extract, 30g/L D-glucose, 250mg/L of each histidine, leucine, adenine,  
103 and uracil) and 30°C was used for the growth of all liquid cultures.

104 To integrate C-terminal truncation mutations into the chromosomal *prf1*<sup>+</sup> locus, primers were  
105 designed to amplify the C-terminal TAP tag from pJT9 (pFA6a-kanMX6-CTAP2) as described  
106 (32). PCR products were transformed into competent JT204 *S. pombe* cells as described (33). To  
107 integrate Plus3 domain point mutations into the chromosomal *prf1*<sup>+</sup> locus, EagI-XhoI digests of  
108 plasmids pJT161, pJT162, or pJT163 (described below) were transformed into competent JT204  
109 cells as described above. Positive transformants were verified by sequencing and western  
110 blotting.  
111

112 **Plasmids.** Plasmids used in this study are listed in Table S2. Full-length Prf1, the N-terminal  
113 region (amino acids 1-213), the Plus3 domain (amino acids 214-345), and the C-terminal region  
114 (amino acids 346-563) were PCR amplified from *S. pombe* cDNA and cloned into pGEX-6P-1.  
115 For the full-length protein, a C-terminal 6xhistidine tag was introduced by PCR. Plus3 domain  
116 point mutations were introduced using the Phusion Site-Directed Mutagenesis kit (ThermoFisher  
117 Scientific) and verified by sequencing.

118 To integrate mutations into the chromosomal *prf1*<sup>+</sup> locus, a ~4.5 kilobase region spanning the  
119 locus and including ~250 base pairs of 5' and 3' homology was PCR amplified from strain  
120 JT202 (*prf1-TAP::kanMX6*) and cloned into pGEX-6P-1 to create pJT150. Plus3 domain  
121 mutations were introduced by site-directed mutagenesis as described above. Wild-type and  
122 mutant *prf1-TAP::kanMX6* constructs were verified by sequencing.  
123

124 **Expression and purification of recombinant Prf1.** GST-fusion proteins were expressed in *E.*  
125 *coli* BL21. Log-phase cultures (500 mL) were induced with 1mM isopropyl-β-D-1-  
126 thiogalactopyranoside (IPTG) and grown at 16°C for 12-16 hours. The cells were then harvested  
127 by centrifugation and resuspended in 25 mL of lysis buffer (20mM Tris [pH 7.5], 200mM NaCl,  
128 20% glycerol, 1mM ethylenediamine tetra acetic acid (EDTA), 1mM dithiothreitol (DTT), 1mM  
129 phenylmethylsulfonyl fluoride (PMSF), 1 mM benzamidine, protease inhibitor cocktail (Roche  
130 Applied Sciences)) with 2.5 mg of lysozyme. After 30 mins on ice, the cell extract concentration  
131 was adjusted to 350mM of NaCl and 0.5% Triton X-100 and then sonicated with the Misonix  
132 Sonicator 3000 (30 s ON/OFF for 14 rounds, output 5.0). All subsequent steps were conducted at

133 4°C. The suspension was centrifuged for 10 minutes at 25,000g and the lysate supernatant was  
134 incubated for 3 hours with 1 mL of glutathione sepharose beads (GE Healthcare) pre-washed in  
135 lysis buffer. The beads were collected, transferred to a small column (Bio-Rad), and washed with  
136 20 mL of wash buffer (20mM Tris [pH 7.5], 350mM NaCl, 20% glycerol, 1mM EDTA, 0.1%  
137 Triton X-100, 1mM DTT, 1mM PMSF, 1mM benzamidine). Beads were eluted stepwise with  
138 10x0.5 mL elution buffer (20mM Tris [pH 7.5], 350mM NaCl, 20% glycerol, 1mM EDTA,  
139 100mM reduced glutathione, 1mM DTT, 1mM PMSF, 1mM benzamidine). Peak fractions were  
140 pooled and dialyzed overnight against 2L of dialysis buffer (20mM HEPES [pH 7.6], 20%  
141 glycerol, 0.15M KOAc, 10mM Mg(OAc)<sub>2</sub>, 1mM EDTA, 1mM DTT). For full-length Prf1, a  
142 second purification step was performed before dialysis. Briefly, eluates were supplemented with  
143 imidazole at a final concentration of 10mM and incubated for 2 hours with 200 µL of Ni-NTA  
144 agarose beads (Qiagen) that were prewashed in buffer C (20mM HEPES [pH 7.6], 150mM KCl,  
145 5% glycerol, 10mM imidazole, 0.1% NP-40, 1mM PMSF, 1mM β-mercaptoethanol). The beads  
146 were collected, washed four times with 1 mL of buffer C, and eluted into 1 mL elution buffer 2  
147 (20mM Tris [pH 7.5], 150mM KCl, 5% glycerol, 200mM Imidazole, 0.1% NP-40, 1mM PMSF,  
148 1mM β-Mercaptoethanol). The eluate was then dialyzed overnight as described above.

149  
150 **Immobilized Peptide Binding Assays.** Spt5-CTD peptides (16) were synthesized as described  
151 (34). 10 µg of either phosphorylated or unphosphorylated peptide were immobilized on 15 µL of  
152 pre-washed streptavidin Dynabeads (Invitrogen) in 200 µL 1X PBS. After a 3-hour incubation at  
153 room temperature on a rocking platform, beads were collected on a magnet and washed twice  
154 with wash buffer (20mM HEPES [pH 7.6], 5% glycerol, 0.1% Triton X-100, 1mM EDTA,  
155 350mM KOAc, 10mM β-glycerophosphate, 1mM PMSF). 50 ng of purified protein was added to  
156 beads and the volume made to 200 µL with binding buffer (20mM HEPES [pH 7.6], 0.1% Triton  
157 X-100, 50mM KOAc, 10mM β-glycerophosphate, 1mM PMSF, 1mg/mL BSA). The reaction  
158 was incubated at 4°C for 1 hour with rocking. The beads were collected, washed four times with  
159 1mL of wash buffer, and resuspended in 20 µL of 1X SDS sample buffer. All samples (5% input  
160 and 50% beads) were boiled at 95°C for 2 minutes, centrifuged, and analyzed by SDS-PAGE and  
161 immunoblotting.

162  
163 **GST Pulldowns.** GST-fusion proteins and purified factors were added in equimolar amounts  
164 (approximately 20nM) in a 200µL binding reaction containing 20mM HEPES [pH 7.6], 0.1%  
165 Triton X-100, 50mM KOAc, 1mM PMSF, 10mM β-glycero-3-phosphate, 0.1 mg/mL BSA.  
166 Binding reactions were incubated for 2 hours at 4°C on a rocking platform. GST-fusions were  
167 recovered by addition of 25 µL of glutathione sepharose beads (prewashed twice with 400 µL of  
168 binding buffer) and incubation for a further 1 hour at 4°C with rocking. The beads were collected  
169 and then washed four times with wash buffer (20mM HEPES [pH 7.6], 5% glycerol, 0.1% Triton  
170 X-100, 1mM EDTA, 350mM KOAc, 10mM β-glycerophosphate, 1mM PMSF). The beads were  
171 then resuspended with 25µL of 1X SDS sample buffer. All samples (5% input and 50% beads)  
172 were boiled at 95°C for 2 minutes, centrifuged, and analyzed by SDS-PAGE and  
173 immunoblotting.

174  
175 **Immunoblotting.** Whole-cell extracts prepared in trichloroacetic acid or purified proteins were  
176 analyzed by SDS-PAGE and immunoblotting as described previously (13). The following  
177 commercial antibodies were used: TAP tag (ThermoFisher Scientific #PICAB1001), Rpb1  
178 (8WG16; Covance #MMS-126R-200), histone H3 (Abcam #ab1791), ubiquityl-histone H2B



179 (Millipore #05-1312-I), GST-tag (ThermoFisher Scientific #8-326), HIS-tag (Sigma-Aldrich  
180 H1029), and Streptactin-HRP (ThermoFisher Scientific #21130). Alpha-tubulin antibody (TAT-  
181 1) was provided by Dr. Keith Gull (35). Images were acquired on Amersham Imager 600 (GE  
182 Healthcare) or on film. Images were processed using ImageJ software for quantification.

183  
184 **Electrophoretic Mobility Shift Assays.** Reactions contained 0.1 $\mu$ M of FITC-labeled  
185 deoxynucleotide probe [5'-CCGCCCCGCC-(T)<sub>10</sub>-CCCGCCGCC-FITC], 10mM Tris [pH 7.5],  
186 10% glycerol, 100mM NaCl, 0.1 mg/mL BSA, and 0.1-0.5 $\mu$ M recombinant GST-Plus3 protein  
187 in a final volume of 20  $\mu$ L. For reactions containing the “bubble” probe the probe above was first  
188 hybridized to 5'-GGGCGGCGGG-(T)<sub>10</sub>-GGCGGGGCGG. After a 20-minute incubation on ice,  
189 reactions were briefly centrifuged and loaded on native 5% polyacrylamide gels. Gels were  
190 prepared and run in 0.5X Tris-borate-EDTA and run at 100 V for 1 hour at 4°C. Images were  
191 acquired on the Typhoon Trio Variable Mode Imager system (GE Healthcare). Rpb1 peptides  
192 used in competition experiments were synthesized as described (33) with sequence biotin-  
193 PSYSPTSPSYSPTSPS (unphos) or biotin-PSYSPTS\*PSYS\*PTSPS (phos; asterisks follow  
194 phosphoserines).

195  
196 **TAP-tagged Protein Purification.** Tpr1-TAP was purified from whole cell extracts as described  
197 previously (16,36). 10  $\mu$ L of the purified material was analyzed by SDS-PAGE alongside BSA  
198 standards followed by Coomassie or silver staining.

199  
200 **Fluorescence Microscopy.** Diamino-phenylindole (DAPI) and calcofluor staining was  
201 conducted as previously described with minor changes (13). Cells were viewed using a Leica  
202 DM 5000b microscope with Lumenera's Infinity 3-1UR camera at 40X objective. Images were  
203 processed and cells were counted using ImageJ software. Phenotypes scored were unseparated  
204 chains of cells (with septa in between each nuclei) and “twinned” septa (multiple septa  
205 separating two nucleic) (13,16). Each strain was scored three times based on images of >100  
206 cells.

207  
208 **Chromatin Immunoprecipitation (ChIP).** TAP-ChIP was conducted as previously described  
209 (37) with some modifications. ChIP experiments were normalized to spiked-in *S. cerevisiae*  
210 chromatin (prepared from strain JTY41 (genotype *MATa his3 $\Delta$ 1 leu2 $\Delta$ 0 LYS2 ura3 $\Delta$ 0 RPB1-*  
211 *TAP::kanMX6*)) unless otherwise indicated. *S. pombe* chromatin was prepared as described using  
212 1.5x10<sup>7</sup> cells per crosslinked sample in a final volume of 1mL. *S. cerevisiae* chromatin was  
213 prepared using the same protocol but with 3.0x10<sup>7</sup> cells per crosslinked sample. 50 $\mu$ L of *S.*  
214 *cerevisiae* spike-in chromatin was added to each *S. pombe* chromatin sample prior to conducting  
215 the immunoprecipitation (IP) step. A 100  $\mu$ L sample of input was then taken from each sample.  
216 The IP was conducted by adding 20 $\mu$ L of IgG sepharose beads (GE Healthcare) to each IP  
217 sample for a 4-hour incubation at 4°C. Following the IP, the beads were eluted and then washed  
218 with 150 $\mu$ L of TE. For the DNA purification, all samples were incubated with 0.5  $\mu$ L of RNase  
219 A (10 mg/mL) and 1  $\mu$ L of glycogen (20 mg/mL) for an hour at 37°C, followed by 1.25  $\mu$ L  
220 Proteinase K (20 mg/mL) for 3 hours at 37°C. Samples were then extracted with 250  $\mu$ L of  
221 phenol:chloroform:isoamyl alcohol and 250  $\mu$ L chloroform as described. Primers for qPCR  
222 analysis are listed in Table S3. A primer pair in the coding region of the *S. cerevisiae* *PMA1* gene  
223 was used for normalization.

224 **Results**

225

## 226 **Functional divergence of Prf1 Plus3 domain and phosphorylated Spt5**

227 To examine the physiological significance of pSpt5 binding by the Plus3 domain in *S. pombe*, we  
228 introduced a point mutation at Arg227 of *prf1*<sup>+</sup> that is predicted to disrupt the pSpt5 binding  
229 pocket (R227A; Figure 1A) (15,18). We verified the effect on pSpt5 interaction using  
230 immobilized peptide pulldowns. Biotinylated peptides corresponding to either unmodified or  
231 phosphorylated Spt5 CTD repeats were immobilized on streptavidin beads and incubated with  
232 purified recombinant Plus3 domain, and bound proteins were analyzed by immunoblot.  
233 Quantification of the immunoblot signals showed that wild-type Plus3 preferentially bound to the  
234 pSpt5 peptide compared to the unmodified peptide. This preference was completely abrogated by  
235 the R227A mutation, as expected (Figures 1B and S1A). We also verified that the HMD and C-  
236 terminal regions of Prf1 did not contribute to pSpt5 binding (Figure S1A and S1B).

237

238 To examine the impact of pSpt5 binding on Prf1 function *in vivo*, we introduced the R227A  
239 mutation into the endogenous *prf1*<sup>+</sup> locus and compared it to the effect of mutations in the Spt5  
240 CTD that abolish all of the Cdk9-dependent phosphorylation sites. Spt5 CTD mutations (T1A or  
241 T1E) were engineered in the context of a truncated, 7-repeat *spt5*<sup>+</sup> CTD domain whose function  
242 is comparable to wild-type [*spt5*(7)] (16,29,38). We also analyzed the *spt5-ΔC* mutant in which  
243 the entire CTD is deleted. In chromatin immunoprecipitation (ChIP)-qPCR assays, Prf1-R227A  
244 recruitment to transcribed genes was significantly decreased (up to 5-fold) throughout gene  
245 bodies compared to wild-type to levels close to those obtained in the untagged control (Figures  
246 1C and S2). A comparable effect on Prf1 chromatin association was elicited by *spt5-T1A* and  
247 *spt5-T1E* mutants (16). The *prf1-R227A* mutation caused a more modest, two-fold reduction in  
248 Prf1 protein levels, which argues that the reduced chromatin occupancy reflects an impaired  
249 interaction (Figures 1D and S3). Despite the strong effects of Plus3 or Spt5 phosphorylation  
250 mutations on Prf1 chromatin occupancy, we observed relatively modest effects on H2Bub1  
251 levels. Immunoblotting of whole-cell extracts indicated that H2Bub1 levels were not  
252 significantly affected by *prf1-R227A* and were reduced two-fold by *spt5-T1A*; a complete loss  
253 was observed in the *spt5-ΔC* mutant (Figures 1E, 1F, and S3). These results suggest that the  
254 Plus3 domain/pSpt5 interaction is necessary for Prf1 chromatin binding but is only partially  
255 required for mediating Prf1 function and the effect of Cdk9 activity on H2Bub1.

256

257 Genetic ablation of H2Bub1 (*htb-K119R*) or of Prf1 (*prf1Δ*) lead to cell division defects  
258 (13,16,30). These include unseparated chains of cells with division septa in between each nuclei,  
259 and “twinned” septa (multiple septa separating two nuclei) (13,16). We examined *prf1-R227A*  
260 cells stained with DAPI and calcofluor by fluorescence microscopy and saw no differences from  
261 wild-type (Figure 2A; quantified in Figure 2B). The *spt5-T1A* mutant was also similar to wild-  
262 type in these assays, consistent with the partial requirement of the Plus3 domain/pSpt5  
263 interaction for H2Bub1 formation (Figure 2B) (29).

264

265 We also created double mutants harboring *prf1-R227A* in combination with each of the *spt5*  
266 mutations. Given that the R227A mutation lies within a well-characterized binding site for  
267 pSpt5, we anticipated that any phenotypic effects would be due solely to loss of pSpt5 binding,  
268 and thus we predicted an epistatic relationship between *prf1-R227A* and *spt5-T1A*. Surprisingly,  
269 when the *prf1-R227A* mutation was combined with the *spt5-T1A*, the resulting double mutants  
270 displayed a significant increase in the cell division phenotypes characteristic of *prf1Δ* and *htb-*

271 *K119R* cells (Figures 2A and 2B; the overall septation indices for these strains are shown in  
272 Figure S4). This indicated a synthetic, rather than epistatic relationship between the mutations,  
273 which argues that they affect different pathways. No phenotype was observed in strains with  
274 *prf1-R227A* in combination with the *spt5(7)* allele. The modest synthetic effects observed in  
275 combination with the *spt5-T1E* or *spt5-ΔC* alleles were not statistically significant, indicating  
276 that the synthetic effects were specifically related to loss of pSpt5.

277  
278 We performed immunoblots to monitor Prf1 protein levels in single and double mutant strains.  
279 Interestingly, the *spt5-T1A* and *spt5-ΔC* mutations, but not *spt5-T1E*, resulted in decreased Prf1  
280 protein levels in the wild-type *prf1-TAP* strain, supporting a direct or indirect functional link  
281 between pSpt5 and Prf1. However, introduction of *prf1-R227A* into these strains did not  
282 significantly reduce Prf1 levels relative to those in wild-type *prf1-TAP* (Figures 2C and 2D). We  
283 conclude that the synthetic phenotypes observed in *prf1-R227A spt5-T1A* double mutants are due  
284 to an impaired Prf1 interaction distinct from that with pSpt5.

285  
286 The *prf1Δ* and *htb-K119R* mutants are sensitive to thiabendazole (TBZ), a microtubule-  
287 destabilizing agent that perturbs mitotic chromosome segregation, and methyl methanesulfonate  
288 (MMS), a DNA-damaging agent (39-41)(Figure S5). To determine whether these phenotypes  
289 were subject to similar synthetic effects, we assessed growth of *prf1-R227A*, *spt5* CTD single  
290 mutants, and double mutants in the presence of TBZ or MMS. The double mutant strain with  
291 *spt5-T1A*, but not with *spt5(7)* or *spt5-T1E*, showed a marked decrease in growth on the control  
292 media compared to either single mutant, consistent with the observed cell division phenotypes  
293 (Figure S5). In the presence of either TBZ or MMS, growth of this double mutant was  
294 specifically suppressed, whereas no effect on growth was observed for either single mutant or the  
295 other double mutant combinations. The *spt5-ΔC* mutant was sensitive to TBZ and MMS on its  
296 own, and this sensitivity was enhanced in combination with *prf1-R227A*. Together, these  
297 synthetic phenotypes establish an additional function for the pSpt5-binding surface of the Plus3  
298 domain, as well as a Plus3-independent function for pSpt5.

299  
300

### 301 **Nucleic acid binding activity of the Plus3 domain is required for Prf1 recruitment to** 302 **chromatin and is competitive with pSpt5 binding**

303 We investigated whether the additional function of the Plus3 domain could be attributed to its  
304 ability to bind nucleic acids. We first used electrophoretic mobility shift assays (EMSA) to  
305 assess binding of recombinant Prf1 Plus3 domain to a fluorescently labeled ssDNA probe (30  
306 deoxynucleotides in length). In the presence of increasing amounts of Plus3 domain, the intensity  
307 of the band corresponding to the free probe diminished and intensity of a diffuse band close to  
308 the well increased; we also noted a general increase in signal intensity throughout the lane  
309 (Figure 3A; see arrow). This pattern likely reflects formation of heterogeneous protein-nucleic  
310 acid complexes, similar to what was previously observed for the Plus3 domain from human Rtf1  
311 (18). Prf1 Plus3 domain also bound a “bubble” DNA substrate (a double-stranded probe with a  
312 central region of non-complementarity designed to mimic the transcription bubble) (Figure 3A).  
313 Competition experiments showed no apparent binding to dsDNA, but indicated that RNA  
314 competes for binding to labeled ssDNA probe just as or more effectively than ssDNA (Figure  
315 S6A-C). Thus, nucleic acid binding is a conserved property of the Plus3 domain.

316



317 Previous studies showed that residues in the predicted PAZ subdomain, distant from the pSpt5  
318 binding pocket, were critical for ssDNA binding (15,18). We substituted two equivalent  
319 positions in the Prf1 Plus3 domain-Arg262 and Arg296-with glutamates (Figure 3B). These  
320 substitutions had minimal effect on interaction with pSpt5 in immobilized peptide pull-downs,  
321 although the R262E mutation decreased (but did not eliminate) phospho-binding preference  
322 (Figure 3C). As was found for human Plus3, both mutations abolished the nucleic acid-binding  
323 of Prf1 Plus3 (Figure 3D). Interestingly, the R227A mutation also dramatically decreased the  
324 Plus3 domain's nucleic acid binding activity, although some mobility shift could be discerned at  
325 higher protein concentrations (Figure 3D). This suggests that pSpt5-binding and nucleic acid-  
326 binding functions may reside in overlapping regions of the Plus3 domain. To confirm this, we  
327 performed EMSA assays with wild-type Plus3 domain in the presence of either phosphorylated  
328 or unphosphorylated Spt5 CTD peptides. We found that the pSpt5 peptide, but not the  
329 unphosphorylated peptide nor a phosphorylated Rpb1-CTD peptide, effectively competed for  
330 binding to ssDNA (Figure 3E, S6D, and S6E). Therefore, pSpt5 and nucleic acid interact with  
331 the Plus3 domain on overlapping binding surfaces in a mutually exclusive manner.

332  
333 To determine the physiological relevance of nucleic acid binding, we conducted *in vivo*  
334 examination of R262E and R296E mutants. Both the *prf1-R262E* and *prf1-R296E* mutations  
335 significantly decreased recruitment of Prf1 to chromatin in ChIP-qPCR assays; *prf1-R262E*  
336 conferred a ~5-fold decrease similar to *prf1-R227A*, whereas *prf1-R296E* conferred a more  
337 modest ~2-fold decrease (Figure 4A and S7). Neither of the *prf1-R262E* and *prf1-R296E*  
338 mutations significantly affected Prf1 protein or H2Bub1 levels (Figures 4B, 4C, and S3). These  
339 data define nucleic acid binding as a biochemical activity distinct from pSpt5 binding that is  
340 required for Prf1 association with transcribed genes.

341  
342 The *prf1-R262E* and *prf1-R296E* mutants displayed phenotypic profiles that were very similar to  
343 that of *prf1-R227A*: they did not show any cell division/morphology deficits or drug sensitivity  
344 on their own, but showed strong synthetic phenotypes in combination with *spt5-T1A* (Figure 4D  
345 and S8). The *prf1-R296E* mutation had milder synthetic effects with *spt5-T1A* on drug sensitivity  
346 than either of the other Plus3 domain mutations, although it interacted strongly with *spt5-ΔC*  
347 (Figure S8). This may be a reflection of its milder effect on Prf1 function in the ChIP assay  
348 (Figure 4A). Prf1 protein levels in the *prf1-R262E spt5* and *prf1-R296E spt5* double mutants  
349 were not significantly different in comparison to Prf1 levels from the respective *spt5* single  
350 mutant (Figure S9). These results show that the nucleic acid binding surface of the Plus3 domain  
351 is important for *in vivo* function of Prf1 independently of the pSpt5 interaction.

### 352 353 **Evidence that the Plus3 domain and the Prf1 C-terminus share a common function**

354 In an effort to characterize other functional regions of *S. pombe* Prf1, we analyzed a series of  
355 truncations of the Prf1 C-terminus, a region of the protein previously implicated in binding to the  
356 PAF complex (17,24,25). C-terminal truncation mutants terminating at amino acids 345, 458, or  
357 472 (*prf1-Δ345*, *prf1-Δ458*, *prf1-Δ472*) were still recruited to transcribed genes by ChIP-qPCR at  
358 levels similar to or even greater than those for wild-type (Figure 5A and S10). The increased  
359 ChIP-qPCR signals correlated with increases in Prf1 protein levels by immunoblot (Figures 5B  
360 and S3). However, H2Bub1 levels were decreased in all three mutants (Figure 5C). Thus, C-  
361 terminally truncated Prf1 proteins are functionally impaired in a manner distinct from Prf1  
362 mutants that disrupt the Plus3 domain.

363  
364 The Prf1 C-terminal truncations did not give rise to cell growth and morphology phenotypes on  
365 their own (Figure 5D). However, like Plus3 domain mutations, they exhibited synthetic  
366 phenotypes in combination with mutations in the Spt5 CTD. For the *prf1-Δ472* and *prf1-Δ458*  
367 double mutant strains, the synthetic phenotypes were observed for all assays tested in  
368 combination with *spt5-ΔC*. Double mutants with *spt5-T1A* exhibited assay-dependent effects:  
369 *prf1-Δ472* caused septation defects, and MMS sensitivity, whereas *prf1-Δ458* caused septation  
370 defects, TBZ sensitivity, and MMS sensitivity (Figure 5D and S11). Modest septation  
371 phenotypes were observed in double mutants with *spt5-T1E* but these were not statistically  
372 significant, suggesting that the function of this C-terminal portion of Prf1 is related to loss of  
373 Spt5 CTD phosphorylation (Figure 5D and S11). The largest *prf1* truncation mutation, *prf1-*  
374 *Δ345*, displayed cell division/ morphology deficits and drug sensitivity with the *spt5-T1A*, *T1E*  
375 and *ΔC* mutants (Figure 5D and S11). The fact that alanine and glutamate substitutions at the T1  
376 position were similarly deleterious in this background suggests that the larger truncation  
377 impinges on a function that is either stringently dependent on T1, or dependent on  
378 phosphorylated T1 in a way that is not compensated by the negatively charged side-chain. Levels  
379 of the C-terminally truncated Prf1 proteins were unchanged or increased compared to those of  
380 the wild-type Prf1 in the respective *spt5* mutant backgrounds (Figure S12). Taken together, these  
381 results suggest that amino acids 459-562 of Prf1 participate in an interaction that functions in  
382 parallel with Spt5-T1 phosphorylation, similar to the Plus3 domain, and that amino acids 345-  
383 458 of Prf1 participate in an additional function that is more generally sensitive to Spt5 CTD  
384 structure.

385  
386 **Prf1 Plus3 domain and C-terminal region both interact with the PAF complex**  
387 We hypothesized that the Prf1 Plus3 domain and C-terminal region may share a common  
388 physical interactor that accounts for their shared function. This is unlikely to be nucleic acid, as  
389 we have not detected any nucleic acid binding by the Prf1 C-terminal region (data not shown).  
390 The C-terminal region also has no affinity for the Spt5 CTD (Figure S1). Given that the PAF  
391 complex has previously been shown to interact with the C-terminal regions of human and *S.*  
392 *cerevisiae* Rtf1, we investigated interaction between Prf1 and PAF complex using purified  
393 proteins (17,24,25). We observed that full-length Prf1, the Plus3 domain, and the C-terminal  
394 region (amino acids 345-562), produced as recombinant GST fusion proteins (Figure S1A),  
395 associated with native *S. pombe* PAF complex (purified via the TAP method; Figure 6A) in  
396 GST-pulldown experiments (Figure 6B). The N-terminal HMD domain did not pull down PAF,  
397 indicating that PAF interacts specifically with the Plus3 domain and C-terminal region *in vitro*  
398 (Figure 6B). As interaction between the Plus3 domain and PAF has not previously reported, we  
399 used surface plasmon resonance (SPR) to confirm it. Specific dose-dependent binding between  
400 the PAF complex and the Plus3 domain was also apparent in SPR experiments (Figure S13A).  
401 Importantly, the R227A, R262E, and R296E mutations in the Plus3 domain all reduced this  
402 interaction (Figure 6C, Figure S13B). As these mutations all affect nucleic acid binding with the  
403 Plus3 domain, we tested whether the interaction between the Plus3 domain and PAF is nucleic  
404 acid-dependent. We observed similar interaction between Plus3 domain and PAF in the presence  
405 of ethidium bromide, suggesting that it reflects a direct protein-protein interaction (Figure S13C).  
406 Indeed, addition of exogenous ssDNA reduced the efficiency of the Plus3 domain-PAF  
407 interaction in GST pulldowns (data not shown). Thus, interaction with the PAF complex is an  
408 additional Plus3 domain function that may operate in parallel with pSpt5. We have not yet

409 identified genetic interactions between PAF complex mutations and *spt5* CTD mutations that  
410 support this (data not shown). This is likely due to the fact that interaction of the Plus3 domain  
411 with the PAF complex seems to involve multiple individual PAF complex subunits based on our  
412 *in vitro* characterization, including Leo1, the N-terminal half of Tpr1 (Tpr1N), and the C-  
413 terminal half of Paf1 (Paf1C) (Figure S13D-H). However, ChIP-qPCR assays showed a  
414 significant decrease in *prf1-TAP* chromatin occupancy at the *act1*<sup>+</sup>, *spbc354.10*<sup>+</sup> and *nup189*<sup>+</sup>  
415 genes in a *tpr1Δ* strain compared to wild-type (Figure 6D-F). As *tpr1Δ* is predicted to eliminate  
416 the PAF complex, this indicated that PAF, like the Plus3 domain and pSpt5, is necessary for Prf1  
417 chromatin association. PAF chromatin occupancy showed a locus-specific dependence on Prf1,  
418 as *prf1-TAP* recruitment was affected by *prf1Δ* at *act1*<sup>+</sup> but not at the other two loci; this may  
419 reflect locus-specific functions for the Prf1-PAF interaction (Figure 6F). These data suggest that  
420 a direct Prf1-PAF interaction, mediated in part by the Plus3 domain, promotes Prf1 function in  
421 conjunction with pSpt5.

422

## 423 Discussion

424 This study provides novel insights into the function of the Rtf1 Plus3 domain and its relationship  
425 to the Spt5 CTD. Previous studies have centered on the direct interaction between the Plus3  
426 domain and Spt5 CTD repeats phosphorylated at the conserved T1 position and have emphasized  
427 its importance for recruitment of Rtf1 and the PAF complex to transcribed genes (14,15). Our  
428 genetic and biochemical analyses strongly argue that 1) the Plus3 domain engages in an  
429 additional interaction, exclusive of that with pSpt5, that is critical for Prf1/Rtf1 function and  
430 recruitment *in vivo*; and 2) pSpt5 promotes Prf1/Rtf1 function in parallel through another factor.

431  
432 We observed broad phenotypic overlap between *prf1-R227A*, which abolishes pSpt5 recognition,  
433 and both *prf1-R262E* and *prf1-R296E*, which retain pSpt5 binding. The phenotypic effects of  
434 these mutations were strongest in *spt5-T1A* and *spt5-ΔC* genetic backgrounds, and absent or  
435 weak in combination with *spt5-T1E*, indicating that introduction of a negative charge at the T1  
436 position is important for Prf1 function when the Plus3 domain is compromised. The fact that  
437 phenotypic enhancement was observed with *spt5-ΔC* (albeit to varying extents) negates the  
438 possibility that another CTD phosphorylation site is bound by the mutant Plus3 domains, or that  
439 Plus3 domain binding to the unmodified CTD drives the phenotypic effects. We cannot exclude  
440 the possibility that a physical interaction occurs between Prf1 and Spt5 that is independent of the  
441 Spt5 CTD altogether but that requires the Plus3 domain. This would be an entirely different  
442 interaction than that suggested by previous work in budding yeast (14).

443  
444 All of these mutations reduce Prf1 occupancy on gene coding regions by ChIP. This effect is  
445 particularly pronounced for *prf1-R227A* and *prf1-R262E*, both of which exhibit occupancy levels  
446 close to background. Thus, the pSpt5-independent interaction of the Plus3 domain is important  
447 for Prf1 recruitment to chromatin, consistent with the role of the Plus3 domain previously  
448 defined in *S. cerevisiae* (14,17). The *spt5-T1A* mutation reduces Prf1 chromatin occupancy as  
449 well as Prf1 protein levels, although we argue that these effects are not solely attributable to  
450 interaction with Prf1 (16). Thus, Prf1 chromatin occupancy requires both Plus3 domain function  
451 and pSpt5, but Prf1 function can be maintained in the absence of either one. These findings  
452 suggest that Prf1 function does not require its stable association with chromatin and is  
453 compatible with more dynamic associations that are not captured by ChIP (42).

454

455 Recombinant Plus3 domain binds to purified, native PAF complex in a manner that is also  
456 sensitive to *prf1-R227A*, *prf1-R262E*, and *prf1-R296E* mutations. Prf1 interaction with the PAF  
457 complex also involves its C-terminal region, truncation of which leads to synthetic phenotypes in  
458 combination with *spt5-T1A*. Direct interaction between Prf1 and PAF was previously  
459 demonstrated using purified components and was primarily attributed to the C-terminal region of  
460 Prf1 (25,43). Our finding that PAF can also directly interact with the Plus3 domain is also  
461 consistent with crosslinking mass spectrometry analysis of the *S. cerevisiae* Rtf1/PAF complex,  
462 in which both Plus3 and C-terminal regions could be crosslinked to PAF (43). These results  
463 support a model in which the Plus3 domain and the C-terminal region both interact with the PAF  
464 complex, thereby promoting Prf1 function in parallel to pSpt5. This idea is further supported by  
465 the fact that the PAF complex is necessary for Prf1 chromatin occupancy. However, given that  
466 Prf1 function is maintained in cases where its chromatin occupancy is greatly reduced, how  
467 interaction with PAF contributes to Prf1 function remains unclear. Greater insight into the  
468 significance of this interaction will require identification of additional pSpt5-binding factors, as  
469 the genetics argues that pSpt5 contributes in parallel to PAF's function in this context. We detect  
470 interaction between multiple PAF subunits and the Plus3 domain *in vitro*, but interactions  
471 between Prf1 and the PAF complex are weak or undetectable in extracts (as is the case in  
472 metazoans), further complicating efforts to dissect the function of the interaction *in vivo* (16,44).  
473 A more detailed picture of the molecular basis for the cell division and morphology phenotypes  
474 of *prf1Δ* will also be critical to understanding the significance of Prf1 interactions.

475  
476 The *prf1-R227A*, *prf1-R262E*, and *prf1-R296E* mutations all impair a nucleic acid binding  
477 activity of the Plus3 domain. This activity prefers ssDNA over dsDNA, as has been  
478 demonstrated previously for the human Plus3 domain (18). We also show that the affinity of Prf1  
479 Plus3 domain for RNA is similar to that for ssDNA. This is consistent with studies showing  
480 interaction of *S. cerevisiae* Rtf1 with RNA *in vitro* and *in vivo* (45,46). Whether or not nucleic  
481 acid is a physiologically relevant binding partner for the Plus3 domain *in vivo* remains to be  
482 determined. It is clear, however, that the binding of the Plus3 domain to pSpt5 and nucleic acid  
483 are mutually exclusive, because 1) *prf1-R227A* abrogates both, and 2) pSpt5 competes with  
484 nucleic acid for Plus3 domain binding. Nucleic acid also competes with PAF complex for Plus3  
485 binding (data not shown). The differential effects of R262E and R296E on nucleic acid binding  
486 (and PAF complex binding) versus pSpt5 binding suggest that the interaction interface for the  
487 former may be larger. Nonetheless, results of the competition experiments suggest that the Plus3  
488 domain can interact with multiple partners through a common interface (or distinct but  
489 overlapping interfaces). We suggest that multiple Plus3 domain interactions could occur in the  
490 context of an extended Spt5 CTD with multiple phosphorylated repeats. Whereas Prf1 may  
491 directly bind to pSpt5 at some repeats, alternate modes of association may predominate at others.  
492 Our data also suggest that all modes of interaction are needed to observe stable association of  
493 Prf1 with chromatin, but that this apparent plasticity could explain how function is maintained  
494 when either pSpt5 or the Plus3 domain is compromised. Determining whether this plasticity  
495 might be regulated, and what the functional consequences might be for transcription, are  
496 important avenues for future study.

497  
498 Our results point to additional Spt5 CTD interactors that are regulated by CTD phosphorylation  
499 and that promote function of Prf1/Rtf1. Few direct interactions with the Spt5 CTD have been  
500 described previously, and the Plus3/CTD interaction is the only one known to be phospho-

501 specific. Factors involved in 5' and 3' mRNA processing also interact with the Spt5 CTD (47-  
502 49). Phospho-specificity of cleavage and polyadenylation factor interaction with the Spt5 CTD  
503 has not been determined, whereas capping enzyme interaction is blocked by T1 phosphorylation  
504 (47). Interestingly, we observed that T1 phosphorylation also blocks interaction of the PAF  
505 complex with the Spt5 CTD, although the physiological relevance of this interaction is not  
506 known (16). Further investigation of the functional relationship between the Spt5 CTD and  
507 Prf1/Rtf1 may uncover novel mechanisms linking Spt5 CTD phosphorylation to RNAPII  
508 elongation control.

509

510

## 511 **Acknowledgements**

512 We thank K. Gull for kindly providing TAT1 monoclonal antibody against alpha-tubulin; R.  
513 Fisher, B. Schwer and S. Shuman for *S. pombe* strains; F. Robert for *S. cerevisiae* expressing  
514 *RPB1-TAP*; and members of the Tanny lab for helpful discussions. This work was supported by  
515 the Canadian Institutes for Health Research (MOP-130362 to J.C.T., MOP-142184 to D.C.), and  
516 Natural Sciences and Engineering Research Council of Canada (RGPIN 03661-15 to J.C.T.,  
517 RGPIN- 2015-04848 to D.C.). J.C.T. acknowledges support from the Fonds de recherche santé  
518 Quebec (chercheur boursier 33115). The McGill SPR-MS Facility is supported by the Canada  
519 Foundation for Innovation.

520



521 **References**

522

- 523 1. Sobhian, B., Laguette, N., Yatim, A., Nakamura, M., Levy, Y., Kiernan, R. and  
524 Benkirane, M. (2010) HIV-1 Tat assembles a multifunctional transcription elongation  
525 complex and stably associates with the 7SK snRNP. *Mol Cell*, **38**, 439-451.
- 526 2. Krystof, V., Chamrad, I., Jorda, R. and Kohoutek, J. (2010) Pharmacological targeting of  
527 CDK9 in cardiac hypertrophy. *Med Res Rev*, **30**, 646-666.
- 528 3. Baker, A., Gregory, G.P., Verbrugge, I., Kats, L., Hilton, J.J., Vidacs, E., Lee, E.M.,  
529 Lock, R.B., Zuber, J., Shortt, J. *et al.* (2016) The CDK9 Inhibitor Dinaciclib Exerts  
530 Potent Apoptotic and Antitumor Effects in Preclinical Models of MLL-Rearranged Acute  
531 Myeloid Leukemia. *Cancer Res*, **76**, 1158-1169.
- 532 4. Zhou, Q., Li, T. and Price, D.H. (2012) RNA polymerase II elongation control. *Annu Rev*  
533 *Biochem*, **81**, 119-143.
- 534 5. Jonkers, I. and Lis, J.T. (2015) Getting up to speed with transcription elongation by RNA  
535 polymerase II. *Nat Rev Mol Cell Biol*, **16**, 167-177.
- 536 6. Tanny, J.C. (2014) Chromatin modification by the RNA Polymerase II elongation  
537 complex. *Transcription*, **5**, e988093.
- 538 7. Van Oss, S.B., Cucinotta, C.E. and Arndt, K.M. (2017) Emerging Insights into the Roles  
539 of the Paf1 Complex in Gene Regulation. *Trends Biochem Sci*, **42**, 788-798.
- 540 8. Yamaguchi, Y., Shibata, H. and Handa, H. (2013) Transcription elongation factors DSIF  
541 and NELF: promoter-proximal pausing and beyond. *Biochim Biophys Acta*, **1829**, 98-  
542 104.
- 543 9. Jeronimo, C., Collin, P. and Robert, F. (2016) The RNA Polymerase II CTD: The  
544 Increasing Complexity of a Low-Complexity Protein Domain. *J Mol Biol*, **428**, 2607-  
545 2622.
- 546 10. Yamada, T., Yamaguchi, Y., Inukai, N., Okamoto, S., Mura, T. and Handa, H. (2006) P-  
547 TEFb-mediated phosphorylation of hSpt5 C-terminal repeats is critical for processive  
548 transcription elongation. *Mol Cell*, **21**, 227-237.
- 549 11. Pei, Y. and Shuman, S. (2003) Characterization of the Schizosaccharomyces pombe  
550 Cdk9/Pch1 protein kinase: Spt5 phosphorylation, autophosphorylation, and mutational  
551 analysis. *J Biol Chem*, **278**, 43346-43356.
- 552 12. Schneider, S., Pei, Y., Shuman, S. and Schwer, B. (2010) Separable functions of the  
553 fission yeast Spt5 carboxyl-terminal domain (CTD) in capping enzyme binding and  
554 transcription elongation overlap with those of the RNA polymerase II CTD. *Mol Cell*  
555 *Biol*, **30**, 2353-2364.
- 556 13. Sanso, M., Lee, K.M., Viladevall, L., Jacques, P.E., Page, V., Nagy, S., Racine, A., St  
557 Amour, C.V., Zhang, C., Shokat, K.M. *et al.* (2012) A Positive Feedback Loop Links  
558 Opposing Functions of P-TEFb/Cdk9 and Histone H2B Ubiquitylation to Regulate  
559 Transcript Elongation in Fission Yeast. *PLoS Genet*, **8**, e1002822.
- 560 14. Mayekar, M.K., Gardner, R.G. and Arndt, K.M. (2013) The recruitment of the  
561 Saccharomyces cerevisiae Paf1 complex to active genes requires a domain of Rtf1 that  
562 directly interacts with the Spt4-Spt5 complex. *Mol Cell Biol*, **33**, 3259-3273.
- 563 15. Wier, A.D., Mayekar, M.K., Heroux, A., Arndt, K.M. and VanDemark, A.P. (2013)  
564 Structural basis for Spt5-mediated recruitment of the Paf1 complex to chromatin. *Proc*  
565 *Natl Acad Sci U S A*, **110**, 17290-17295.

- 566 16. Mbogning, J., Nagy, S., Page, V., Schwer, B., Shuman, S., Fisher, R.P. and Tanny, J.C.  
567 (2013) The PAF complex and Prf1/Rtf1 delineate distinct Cdk9-dependent pathways  
568 regulating transcription elongation in fission yeast. *PLoS Genet*, **9**, e1004029.
- 569 17. Warner, M.H., Roinick, K.L. and Arndt, K.M. (2007) Rtf1 is a multifunctional  
570 component of the Paf1 complex that regulates gene expression by directing  
571 cotranscriptional histone modification. *Mol Cell Biol*, **27**, 6103-6115.
- 572 18. de Jong, R.N., Truffault, V., Diercks, T., Ab, E., Daniels, M.A., Kaptein, R. and Folkers,  
573 G.E. (2008) Structure and DNA binding of the human Rtf1 Plus3 domain. *Structure*, **16**,  
574 149-159.
- 575 19. Piro, A.S., Mayekar, M.K., Warner, M.H., Davis, C.P. and Arndt, K.M. (2012) Small  
576 region of Rtf1 protein can substitute for complete Paf1 complex in facilitating global  
577 histone H2B ubiquitylation in yeast. *Proc Natl Acad Sci U S A*, **109**, 10837-10842.
- 578 20. Van Oss, S.B., Shirra, M.K., Bataille, A.R., Wier, A.D., Yen, K., Vinayachandran, V.,  
579 Byeon, I.L., Cucinotta, C.E., Heroux, A., Jeon, J. *et al.* (2016) The Histone Modification  
580 Domain of Paf1 Complex Subunit Rtf1 Directly Stimulates H2B Ubiquitylation through  
581 an Interaction with Rad6. *Mol Cell*, **64**, 815-825.
- 582 21. Hsu, P.L., Shi, H., Leonen, C., Kang, J., Chatterjee, C. and Zheng, N. (2019) Structural  
583 Basis of H2B Ubiquitination-Dependent H3K4 Methylation by COMPASS. *Mol Cell*, **76**,  
584 712-723 e714.
- 585 22. Batta, K., Zhang, Z., Yen, K., Goffman, D.B. and Pugh, B.F. (2011) Genome-wide  
586 function of H2B ubiquitylation in promoter and genic regions. *Genes Dev*, **25**, 2254-  
587 2265.
- 588 23. Worden, E.J., Hoffmann, N.A., Hicks, C.W. and Wolberger, C. (2019) Mechanism of  
589 Cross-talk between H2B Ubiquitination and H3 Methylation by Dot1L. *Cell*, **176**, 1490-  
590 1501 e1412.
- 591 24. Cao, Q.F., Yamamoto, J., Isobe, T., Tateno, S., Murase, Y., Chen, Y., Handa, H. and  
592 Yamaguchi, Y. (2015) Characterization of the Human Transcription Elongation Factor  
593 Rtf1: Evidence for Nonoverlapping Functions of Rtf1 and the Paf1 Complex. *Mol Cell*  
594 *Biol*, **35**, 3459-3470.
- 595 25. Kim, J., Guermah, M. and Roeder, R.G. (2010) The Human PAF1 Complex Acts in  
596 Chromatin Transcription Elongation Both Independently and Cooperatively with  
597 SII/TFIIS. *Cell*, **140**, 491-503.
- 598 26. Zhou, K., Kuo, W.H., Fillingham, J. and Greenblatt, J.F. (2009) Control of transcriptional  
599 elongation and cotranscriptional histone modification by the yeast BUR kinase substrate  
600 Spt5. *Proc Natl Acad Sci U S A*, **106**, 6956-6961.
- 601 27. Liu, Y., Warfield, L., Zhang, C., Luo, J., Allen, J., Lang, W.H., Ranish, J., Shokat, K.M.  
602 and Hahn, S. (2009) Phosphorylation of the transcription elongation factor Spt5 by yeast  
603 Bur1 kinase stimulates recruitment of the PAF complex. *Mol Cell Biol*, **29**, 4852-4863.
- 604 28. Deng, P., Zhou, Y., Jiang, J., Li, H., Tian, W., Cao, Y., Qin, Y., Kim, J., Roeder, R.G.,  
605 Patel, D.J. *et al.* (2018) Transcriptional elongation factor Paf1 core complex adopts a  
606 spirally wrapped solenoidal topology. *Proc Natl Acad Sci U S A*, **115**, 9998-10003.
- 607 29. Mbogning, J., Page, V., Burston, J., Schwenger, E., Fisher, R.P., Schwer, B., Shuman, S.  
608 and Tanny, J.C. (2015) Functional interaction of Rpb1 and Spt5 C-terminal domains in  
609 co-transcriptional histone modification. *Nucleic Acids Res*, **43**, 9766-9775.

- 610 30. Tanny, J.C., Erdjument-Bromage, H., Tempst, P. and Allis, C.D. (2007) Ubiquitylation of  
611 histone H2B controls RNA polymerase II transcription elongation independently of  
612 histone H3 methylation. *Genes Dev*, **21**, 835-847.
- 613 31. Moreno, S., Klar, A. and Nurse, P. (1991) Molecular genetic analysis of fission yeast  
614 *Schizosaccharomyces pombe*. *Methods Enzymol*, **194**, 795-823.
- 615 32. Bähler, J., Wu, J.-Q., Longtine, M.S., Shah, N.G., McKenzie Iii, A., Steever, A.B., Wach,  
616 A., Philippsen, P. and Pringle, J.R. (1998) Heterologous modules for efficient and  
617 versatile PCR-based gene targeting in *Schizosaccharomyces pombe*. *Yeast*, **14**, 943-951.
- 618 33. Rodríguez-López, M., Cotobal, C., Fernández-Sánchez, O., Borbarrón Bravo, N., Oktriani,  
619 R., Abendroth, H., Uka, D., Hoti, M., Wang, J., Zaratiegui, M. *et al.* (2017) A  
620 CRISPR/Cas9-based method and primer design tool for seamless genome editing in  
621 fission yeast [version 3; peer review: 2 approved]. *Wellcome Open Research*, **1**.
- 622 34. Lamine, A., Poujol de Molliens, M., Letourneau, M., Hebert, T.E., Vaudry, D., Fournier,  
623 A. and Chatenet, D. (2019) The amidated PACAP1-23 fragment is a potent reduced-size  
624 neuroprotective agent. *Biochim Biophys Acta Gen Subj*, **1863**, 129410.
- 625 35. Woods, A., Sherwin, T., Sasse, R., MacRae, T.H., Baines, A.J. and Gull, K. (1989)  
626 Definition of individual components within the cytoskeleton of *Trypanosoma brucei* by a  
627 library of monoclonal antibodies. *J Cell Sci*, **93 ( Pt 3)**, 491-500.
- 628 36. Racine, A., Page, V., Nagy, S., Grabowski, D. and Tanny, J.C. (2012) Histone H2B  
629 ubiquitylation promotes activity of the intact Set1 histone methyltransferase complex in  
630 fission yeast. *J Biol Chem*, **287**, 19040-19047.
- 631 37. Mbogning, J. and Tanny, J.C. (2017) In Guillemette, B. and Gaudreau, L. R. (eds.),  
632 *Histones: Methods and Protocols*. Springer New York, New York, NY, pp. 199-210.
- 633 38. Schneider, S., Pei, Y., Shuman, S. and Schwer, B. (2010) Separable Functions of the  
634 Fission Yeast Spt5 Carboxyl-Terminal Domain (CTD) in Capping Enzyme Binding and  
635 Transcription Elongation Overlap with Those of the RNA Polymerase II CTD. *Molecular  
636 and Cellular Biology*, **30**, 2353.
- 637 39. Page, V., Chen, J.J., Durand-Dubief, M., Grabowski, D., Oya, E., Sanso, M., Martin,  
638 R.D., Hebert, T.E., Fisher, R.P., Ekwall, K. *et al.* (2019) Histone H2B Ubiquitylation  
639 Regulates Histone Gene Expression by Suppressing Antisense Transcription in Fission  
640 Yeast. *Genetics*.
- 641 40. Sadeghi, L., Siggens, L., Svensson, J.P. and Ekwall, K. (2014) Centromeric histone H2B  
642 monoubiquitination promotes noncoding transcription and chromatin integrity. *Nature  
643 structural & molecular biology*, **21**, 236-243.
- 644 41. Zeng, M., Ren, L., Mizuno, K., Nestoras, K., Wang, H., Tang, Z., Guo, L., Kong, D., Hu,  
645 Q., He, Q. *et al.* (2016) CRL4(Wdr70) regulates H2B monoubiquitination and facilitates  
646 Exo1-dependent resection. *Nat Commun*, **7**, 11364.
- 647 42. Piro, A.S., Mayekar, M.K., Warner, M.H., Davis, C.P. and Arndt, K.M. (2012) Small  
648 region of Rtf1 protein can substitute for complete Paf1 complex in facilitating global  
649 histone H2B ubiquitylation in yeast. *Proceedings of the National Academy of Sciences*,  
650 **109**, 10837-10842.
- 651 43. Xu, Y., Bernecky, C., Lee, C.-T., Maier, K.C., Schwalb, B., Tegunov, D., Plitzko, J.M.,  
652 Urlaub, H. and Cramer, P. (2017) Architecture of the RNA polymerase II-Paf1C-TFIIS  
653 transcription elongation complex. *Nature Communications*, **8**, 15741.

- 654 44. Huttlin, E.L., Ting, L., Bruckner, R.J., Gebreab, F., Gygi, M.P., Szpyt, J., Tam, S.,  
655 Zarraga, G., Colby, G., Baltier, K. *et al.* (2015) The BioPlex Network: A Systematic  
656 Exploration of the Human Interactome. *Cell*, **162**, 425-440.
- 657 45. Dermody, J.L. and Buratowski, S. (2010) Leo1 subunit of the yeast paf1 complex binds  
658 RNA and contributes to complex recruitment. *The Journal of biological chemistry*, **285**,  
659 33671-33679.
- 660 46. Battaglia, S., Lidschreiber, M., Baejen, C., Torkler, P., Vos, S.M. and Cramer, P. (2017)  
661 RNA-dependent chromatin association of transcription elongation factors and Pol II CTD  
662 kinases. *Elife*, **6**.
- 663 47. Doamekpor, S.K., Sanchez, A.M., Schwer, B., Shuman, S. and Lima, C.D. (2014) How  
664 an mRNA capping enzyme reads distinct RNA polymerase II and Spt5 CTD  
665 phosphorylation codes. *Genes Dev*, **28**, 1323-1336.
- 666 48. Mayer, A., Schrieck, A., Lidschreiber, M., Leike, K., Martin, D.E. and Cramer, P.  
667 (2012) The spt5 C-terminal region recruits yeast 3' RNA cleavage factor I. *Mol Cell Biol*,  
668 **32**, 1321-1331.
- 669 49. Wen, Y. and Shatkin, A.J. (1999) Transcription elongation factor hSPT5 stimulates  
670 mRNA capping. *Genes Dev*, **13**, 1774-1779.
- 671  
672

673 **Figure Legends**

674  
675 **Figure 1. The *prf1-R227A* mutation abolishes pSpt5-binding and chromatin association, but**  
676 **preserves Prf1 function. (A)** Pymol illustration mapping the location of Prf1 R227 on the  
677 crystal structure of the human Plus3 domain in complex with a pSpt5 peptide (PDB 4L1U). R366  
678 is the equivalent position in the human protein (15). **(B)** Immobilized peptide pulldowns with the  
679 indicated Spt5 CTD peptides and the indicated recombinant GST fusion proteins. Binding  
680 reactions were analyzed by SDS-PAGE and immunoblotting with GST antibody. Top:  
681 Representative GST immunoblot. “IN” denotes a 10% input. Bottom left: Quantification of ratio  
682 between bound signal of phosphorylated Spt5 CTD and unphosphorylated Spt5 CTD peptides.  
683 Error bars denote standard error of the mean from 4 independent experiments. \*  $p \leq 0.05$ ; two-  
684 sided t-test. Bottom right: Quantification of bound signal relative to input for each of the 4  
685 independent experiments. Lines between phosphorylated Spt5 CTD and unphosphorylated Spt5  
686 CTD indicate corresponding signals within each experiment. **(C)** TAP-tag ChIP was performed  
687 on the indicated strains and quantified with qPCR using the indicated primers in *act1*<sup>+</sup>; % IP  
688 values were normalized using a primer pair in the *S. cerevisiae PMA1* gene. Length of gene (in  
689 base pairs) and position of PCR amplicons shown in diagram at the top. Error bars denote  
690 standard error of the mean from 3 independent experiments. A two-way ANOVA was conducted  
691 followed by two-sided t-tests with Bonferroni correction between each strain and wild-type  
692 within a specific primer pair. \*\*  $p \leq 0.01$ , \*\*\*\*  $p \leq 0.0001$ . **(D)** Quantification of immunoblots  
693 analyzing Prf1-TAP protein levels normalized to tubulin and then wild-type for the *prf1-R227A*  
694 strain. **(E)** Quantification of H2Bub1 levels normalized to total H3 levels and then wild-type for  
695 the *prf1-R227A* strain. **(F)** Quantifications of H2Bub1 levels normalized to total H3 levels in *spt5*  
696 mutant strains. *spt5*-(7) levels were set to 1. For (D)-(F), error bars denote standard error of the  
697 mean from 3 independent experiments. A one-sample two-sided t-test was conducted between  
698 each strain and its relative normalized wild-type. \*  $p \leq 0.05$ , \*\*\*  $p \leq 0.001$ .

699  
700 **Figure 2. The Plus3 domain and pSpt5 function in parallel pathways. (A)** The indicated  
701 strains were stained with DAPI and calcofluor and visualized by fluorescence microscopy. **(B)**  
702 Quantification of septation defects in indicated strains normalized to the number of septated cells  
703 counted in each indicated strain. Error bars represent standard error of the mean from 3  
704 independent experiments; at least 100 cells were counted for each strain per experiment. A one-  
705 way ANOVA was conducted across all strains followed by two-sided t-tests with Bonferroni  
706 correction between each strain and the wild-type *prf1-TAP* strain, for each specific morphology  
707 defect. #  $p \leq 0.01$ , †  $p \leq 0.001$ , ¥  $p \leq 0.0001$ . **(C)** Immunoblots of whole cell extracts from the  
708 indicated strains. Antibodies are indicated on the left. **(D)** Quantification of Prf1-TAP protein  
709 levels in *prf1-R227A spt5* double mutant strains and *spt5* single mutant strains. Ratios of  
710 TAP/Rpb1 signals for each sample were normalized to that in *prf1-TAP spt5*<sup>+</sup>. Error bars denote  
711 standard error of the mean from 3 independent experiments. A one-way ANOVA was conducted  
712 across all *prf1* strains within a *spt5* background followed by two-sided t-tests with Bonferroni  
713 correction between each *prf1* mutant strain and the wild-type *prf1-TAP* strain in the same *spt5*



714 background.

715

716 **Figure 3. Nucleic acid binding activity of the Plus3 domain is mutually exclusive with pSpt5**  
717 **binding. (A)** EMSAs containing a FITC-labelled ssDNA (left) or “bubble” (bubDNA; right)  
718 DNA probe and a 1x to 5x molar equivalent of the Prf1 Plus3 domain. The predominant shifted  
719 band is denoted with an arrow. \* indicates the free probe. All experiments were repeated at least  
720 3 times and representative images are shown. **(B)** Pymol illustration mapping the location of Prf1  
721 R262 and R296 on the human Plus3 domain/pSpt5 crystal structure (PDB 4L1U). Conservation  
722 of the equivalent positions in the human protein is indicated (15). **(C)** Immobilized peptide  
723 pulldowns with the indicated Spt5 CTD peptides and the indicated recombinant GST fusion  
724 proteins. Binding reactions were analyzed by SDS-PAGE and immunoblotting with GST  
725 antibody. Left: Representative GST immunoblot (blot for GST, GST-Plus3, GST-R227A is  
726 reproduced from Figure 1B). “IN” denotes a 10% input. The left half of this blot is identical to  
727 Figure 1B. Middle: Quantification of ratio between bound signal of phosphorylated Spt5 CTD  
728 and unphosphorylated Spt5 CTD peptides. A two-sided t-test was conducted between the each  
729 Plus3 mutant and the Plus3 wild-type signal ratios. Error bars denote standard error of the mean  
730 from 4 independent experiments. \*  $p \leq 0.05$ . Right: Quantification of bound signal relative to  
731 input for each of the 4 independent experiments. Lines between phosphorylated Spt5 CTD and  
732 unphosphorylated Spt5 CTD indicate corresponding signals within each experiment. **(D)** EMSAs  
733 containing a FITC-labelled ssDNA probe and a 1x to 5x molar equivalent of the indicated Prf1  
734 Plus3 domain. Lane marked “Plus3” contains wild-type Plus3 domain at 1x concentration. **(E)**  
735 Competition experiments containing ssDNA probe, a 1x molar equivalent of Prf1 Plus3 domain,  
736 and Spt5-CTD peptide (either phosphorylated or unphosphorylated) added at 1x to 5x molar ratio  
737 to probe. For (D) and (E) experiments were repeated at least 3 independent times and  
738 representative images are shown.

739

740 **Figure 4. Disruption of Plus3 domain nucleic acid binding and pSpt5 binding have similar**  
741 **phenotypic outcomes. (A)** TAP-tag ChIP was performed on the indicated strains and quantified  
742 with qPCR using the indicated primers in *act1*<sup>+</sup>; % IP values were normalized using a primer  
743 pair in the *S. cerevisiae PMA1* gene. Length of gene (in base pairs) and position of PCR  
744 amplicons shown in diagram at the top. Error bars denote standard error of the mean from 3  
745 independent experiments. A two-way ANOVA was conducted followed by two-sided t-tests with  
746 Bonferroni correction between each strain and wild-type within a specific primer pair. \*  $p \leq 0.05$ ,  
747 \*\*  $p \leq 0.01$ , \*\*\*  $p \leq 0.001$ , \*\*\*\*  $p \leq 0.0001$ . **(B)** Quantification of immunoblots analyzing Prf1-  
748 TAP protein levels normalized to tubulin and then wild-type of the indicated strains. **(C)**  
749 Quantifications of H2Bub1 levels normalized to total H3 levels and then wild-type of the  
750 indicated strains. For (B) and (C), error bars denote standard error of the mean from 3  
751 independent experiments. A one-sample two-sided t-test was conducted between each strain and  
752 its relative normalized wild-type. **(D)** Quantification of septation defects in indicated strains  
753 normalized to the number of septated cells counted in each indicated strain. At least 100 cells

754 were counted for each strain per experiment. Error bars denote standard error of the mean from 3  
755 independent experiments. A one-way ANOVA was conducted across all strains followed by two-  
756 sided t-tests with Bonferroni correction between each strain and the wild-type *prf1-TAP* strain,  
757 for each specific morphology defect. \*  $p \leq 0.05$ , #  $p \leq 0.01$ , †  $p \leq 0.001$ , ¥  $p \leq 0.0001$ .

758  
759 **Figure 5. The Prf1 C-terminal region and the Plus3 domain have a shared function. (A)**  
760 TAP-tag ChIP was performed on the indicated strains and quantified with qPCR using the  
761 indicated primers in *act1*<sup>+</sup>; % IP values were normalized using a primer pair in the *S. cerevisiae*  
762 *PMA1* gene. Length of gene (in base pairs) and position of PCR amplicons shown in diagram at  
763 the top. Error bars denote standard error of the mean from 3 independent experiments. A two-  
764 way ANOVA was conducted followed by two-sided t-tests with Bonferroni correction between  
765 each strain and wild-type within a specific primer pair. \*\*  $p \leq 0.01$ , \*\*\*  $p \leq 0.001$ , \*\*\*\*  $p \leq$   
766 0.0001. **(B)** Quantification of immunoblots analyzing Prf1-TAP protein levels normalized to  
767 tubulin and then wild-type of the indicated strains. **(C)** Quantifications of H2Bub1 levels  
768 normalized to total H3 levels and then wild-type of the indicated strains. For **(B)** and **(C)**, error  
769 bars denote standard error of the mean from 3 independent experiments. A one-sample two-sided  
770 t-test was conducted between each strain and its relative normalized wild-type. \*  $p \leq 0.05$ , \*\*  $p \leq$   
771 0.01. **(D)** Quantification of septation defects in indicated strains normalized to the number of  
772 septated cells counted in each strain. At least 100 cells were counted for each strain per  
773 experiment. Error bars denote standard error of the mean from 3 independent experiments. A  
774 one-way ANOVA was conducted across all strains followed by two-sided t-tests with Bonferroni  
775 correction between each strain and the wild-type *prf1-TAP* strain, for each specific morphology  
776 defect. \*  $p \leq 0.05$ , #  $p \leq 0.01$ , †  $p \leq 0.001$ , ¥  $p \leq 0.0001$ .

777  
778 **Figure 6. Prf1 interacts with the PAF Complex through its Plus3 domain and C-terminal**  
779 **region. (A)** Native PAF complex purified from a *tpr1-TAP* strain was analyzed by SDS-PAGE  
780 and Coomassie staining. Subunits of the complex are labeled on the right; size markers are  
781 indicated on the left. “Tpr1-CBP” refers to Tpr1 fused to calmodulin-binding peptide that is  
782 present after TAP purification. **(B)** GST pull-downs of the native PAF Complex (purified via  
783 Tpr1-TAP) with full-length, recombinant GST-Prf1 or the indicated domains tagged with GST  
784 were analyzed by SDS-PAGE and immunoblotting with the indicated antibodies (left). “Plus3-C-  
785 term” denotes a fragment of Prf1 consisting of both the Plus3 domain and C-terminus. “I”  
786 denotes input (5%); “IP” denotes bound fraction (50%). All experiments were repeated at least 3  
787 independent times and representative blots are shown. **(C)** As in **(B)** with the indicated GST-  
788 Plus3 domain fusions. **(D-F)** TAP-tag ChIP was performed on the indicated strains and  
789 quantified with qPCR using the indicated primers in *nup189*<sup>+</sup>, *spb354*<sup>+</sup>, and *act1*<sup>+</sup>; % IP values  
790 were normalized to the input of each corresponding strain and primer pair. Length of gene (in  
791 base pairs) and position of PCR amplicons shown in diagram at the top. Error bars denote  
792 standard error of the mean from 3 independent experiments. A two-way ANOVA was conducted  
793 followed by two-sided t-tests with Bonferroni correction between each strain and untagged

794 within a specific primer pair. \*  $p \leq 0.05$ , \*\*  $p \leq 0.01$ , \*\*\*  $p \leq 0.001$ , \*\*\*\*  $p \leq 0.0001$ .  
795  
796

797

# Figure 1

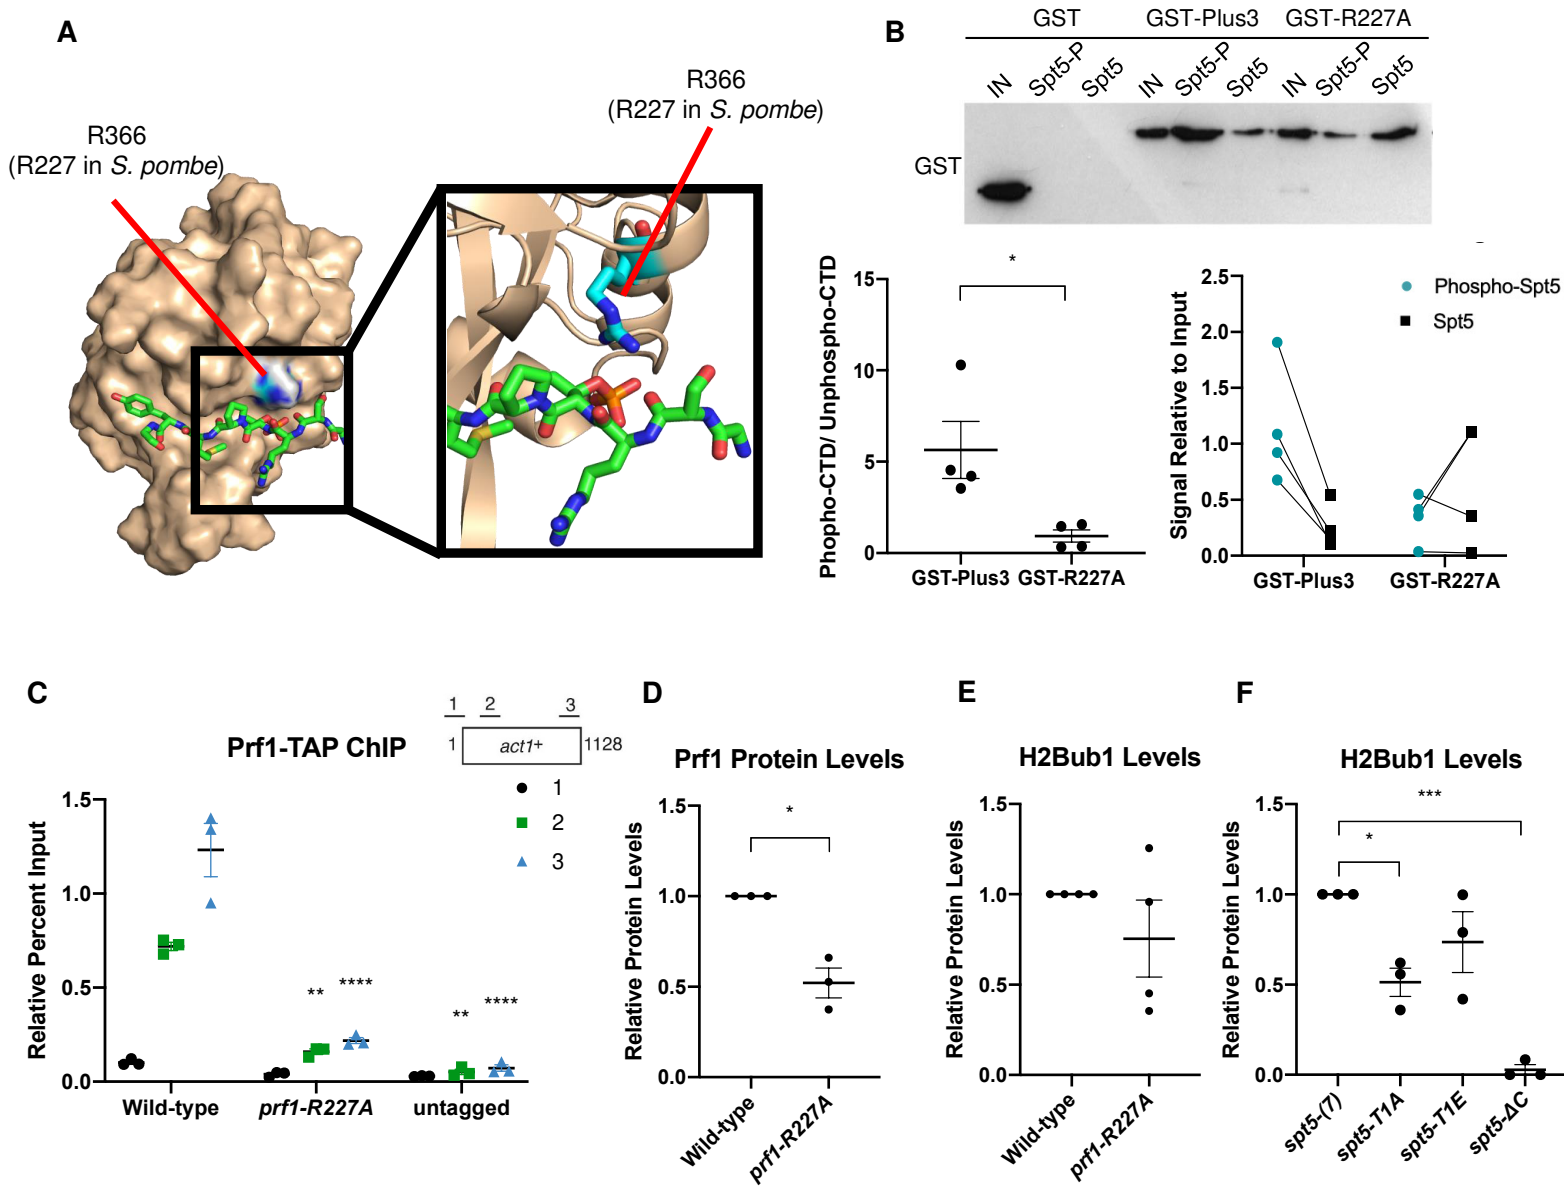



# Figure 2

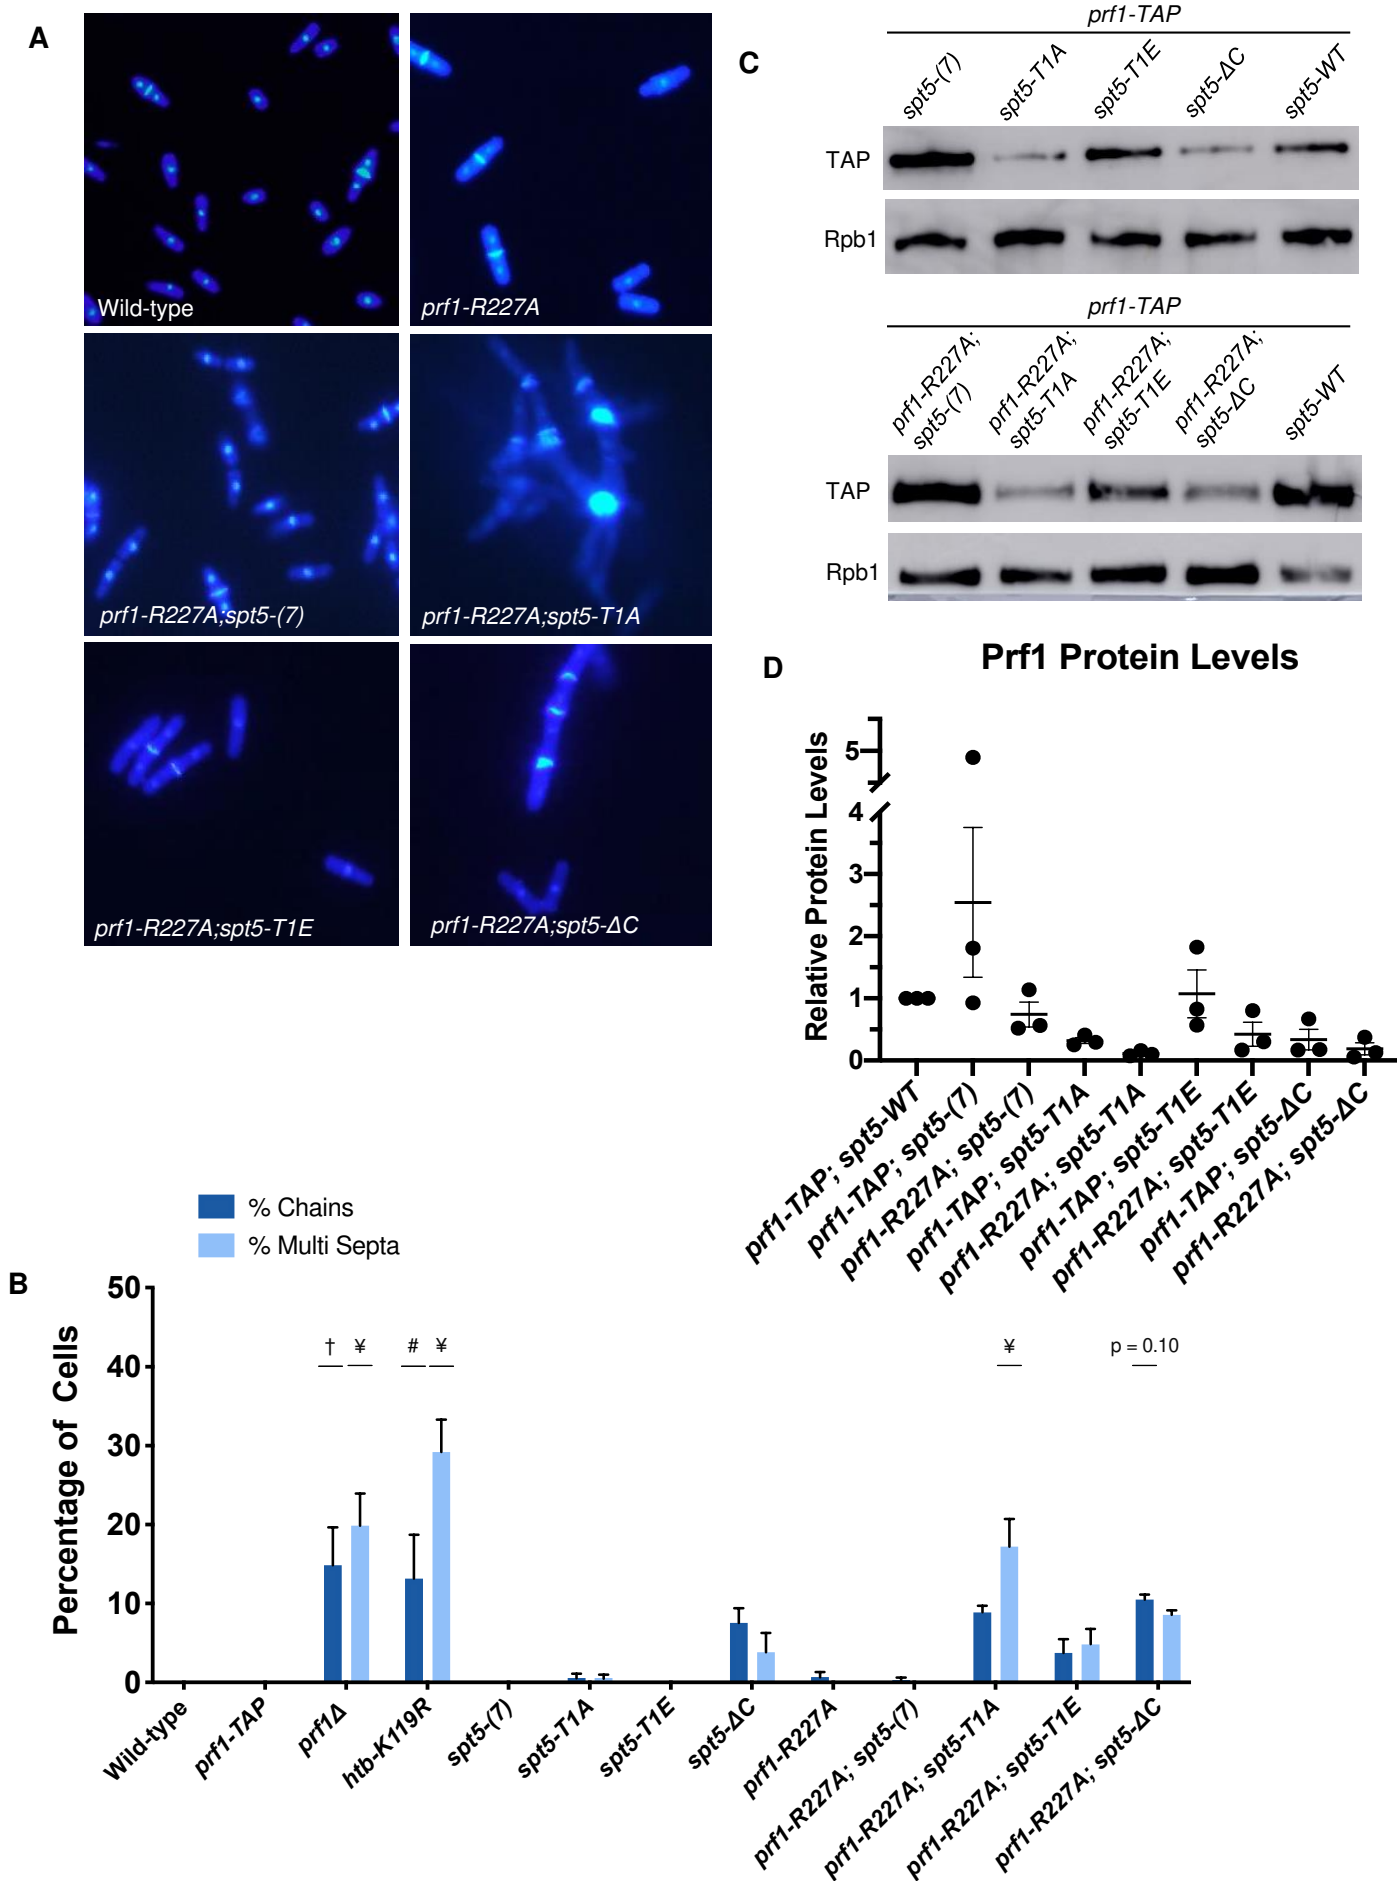

# Figure 3

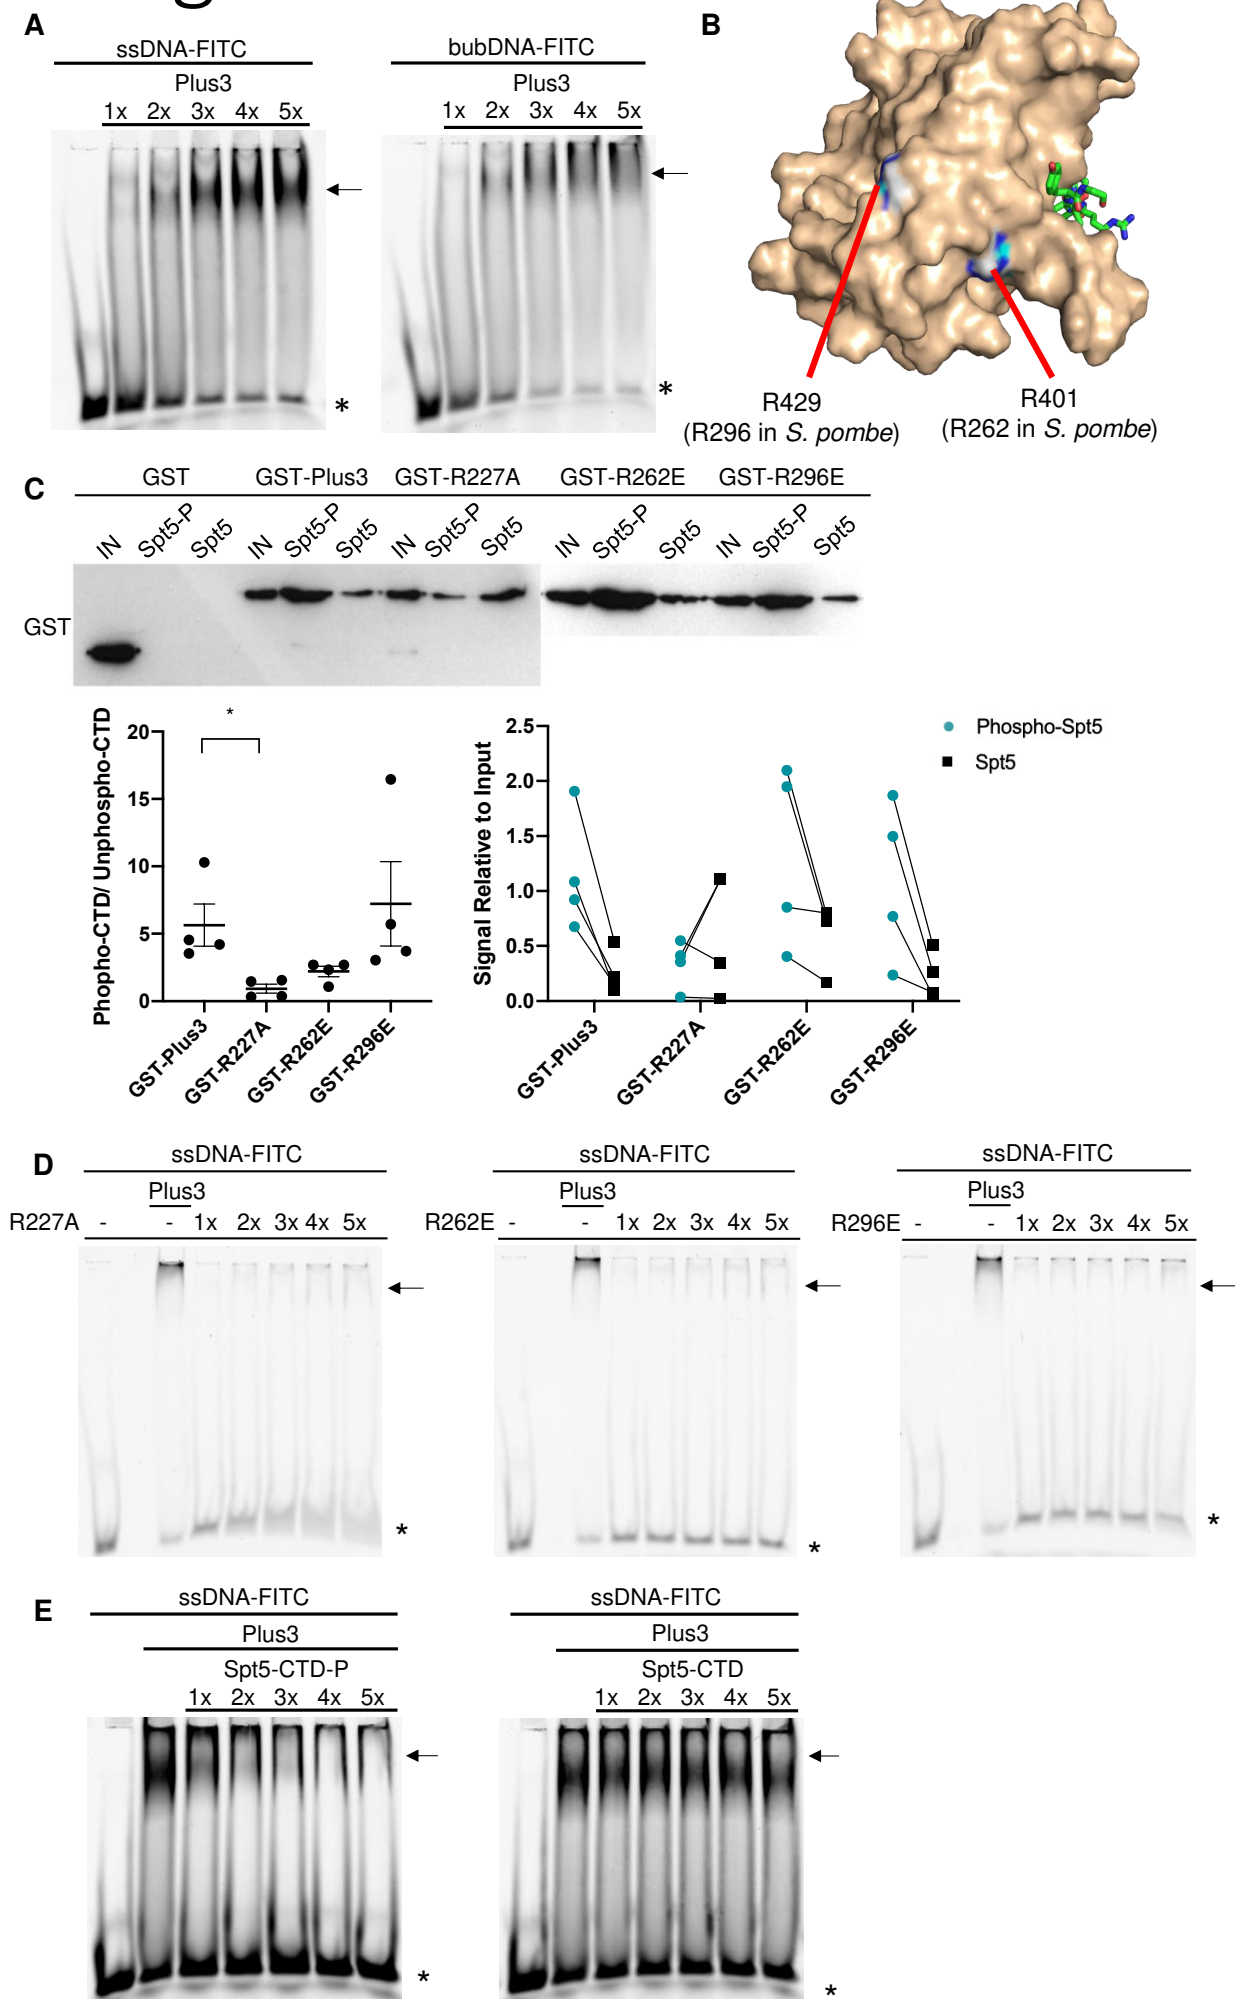

# Figure 4

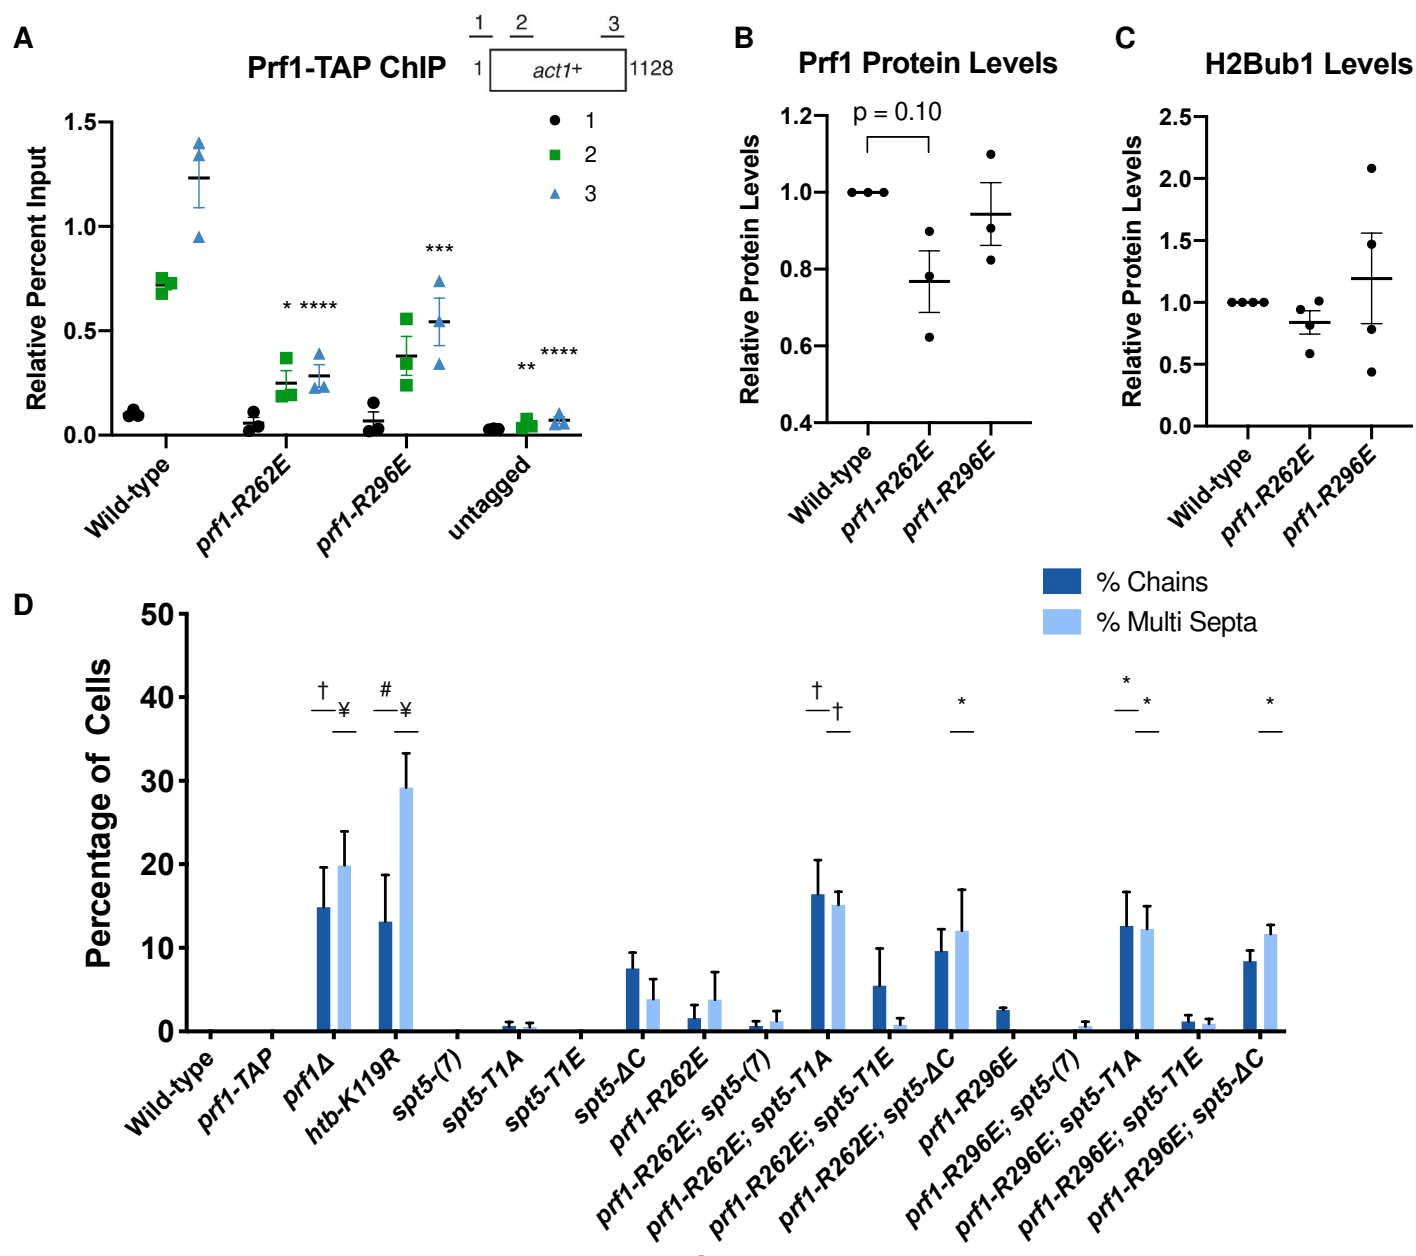

# Figure 5

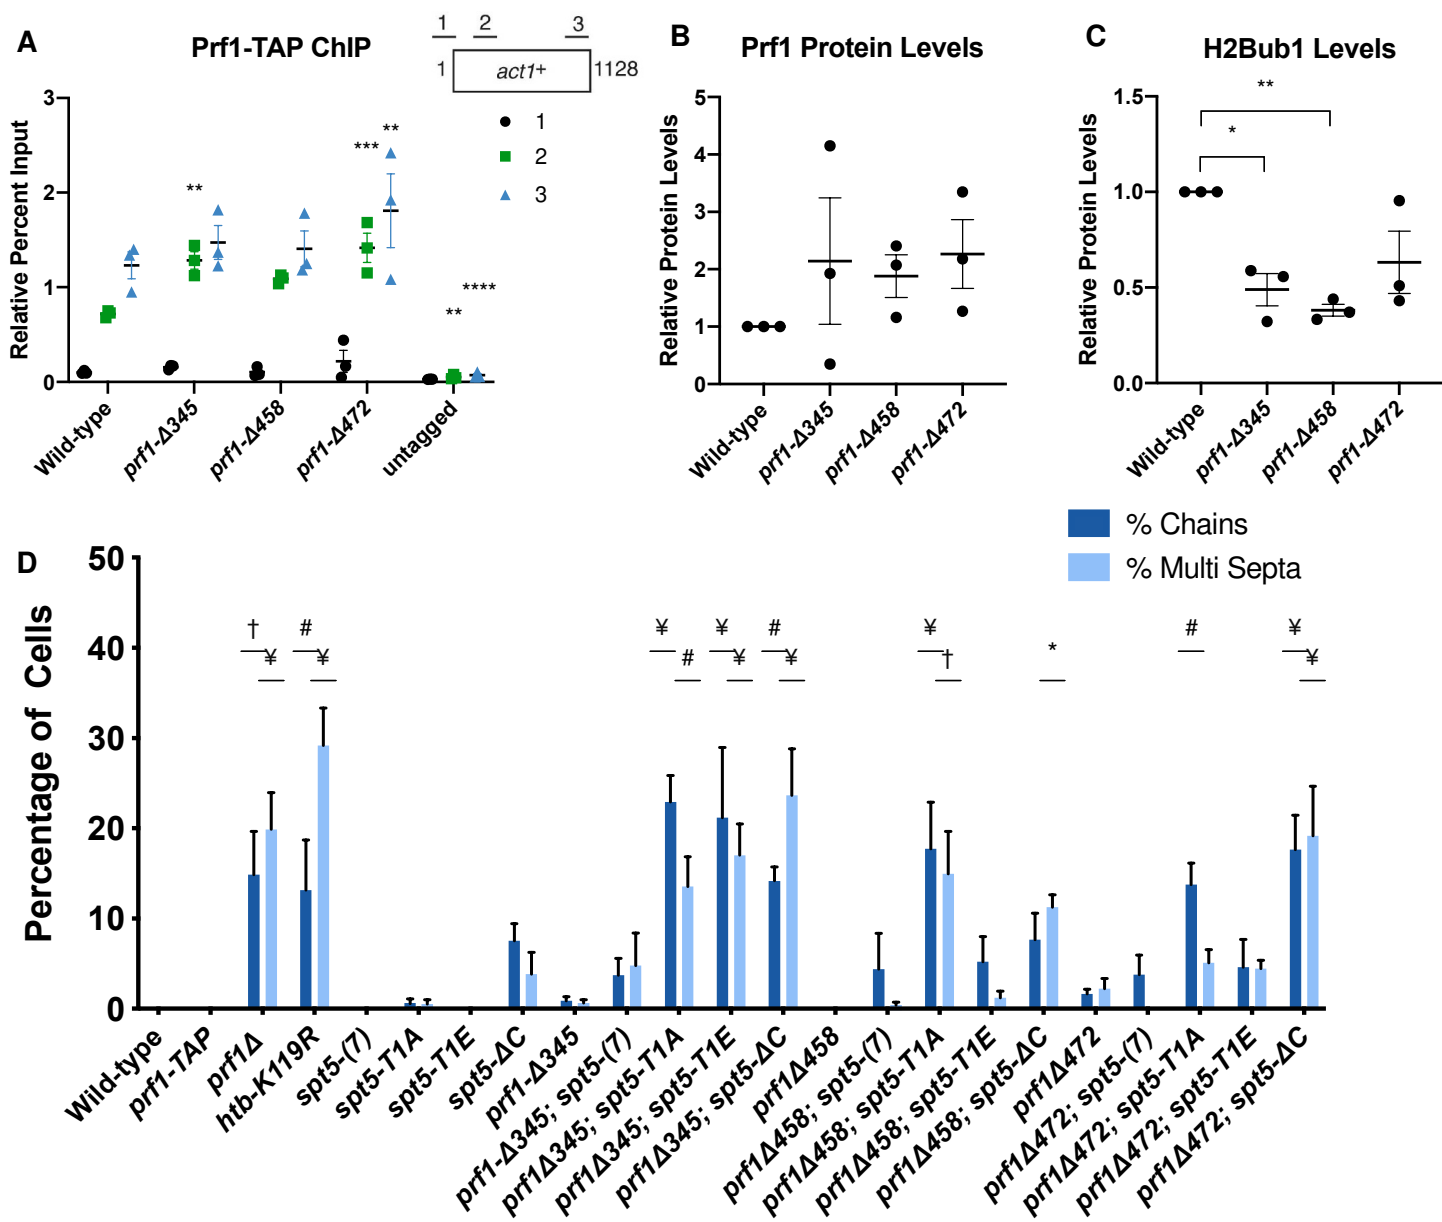

# Figure 6

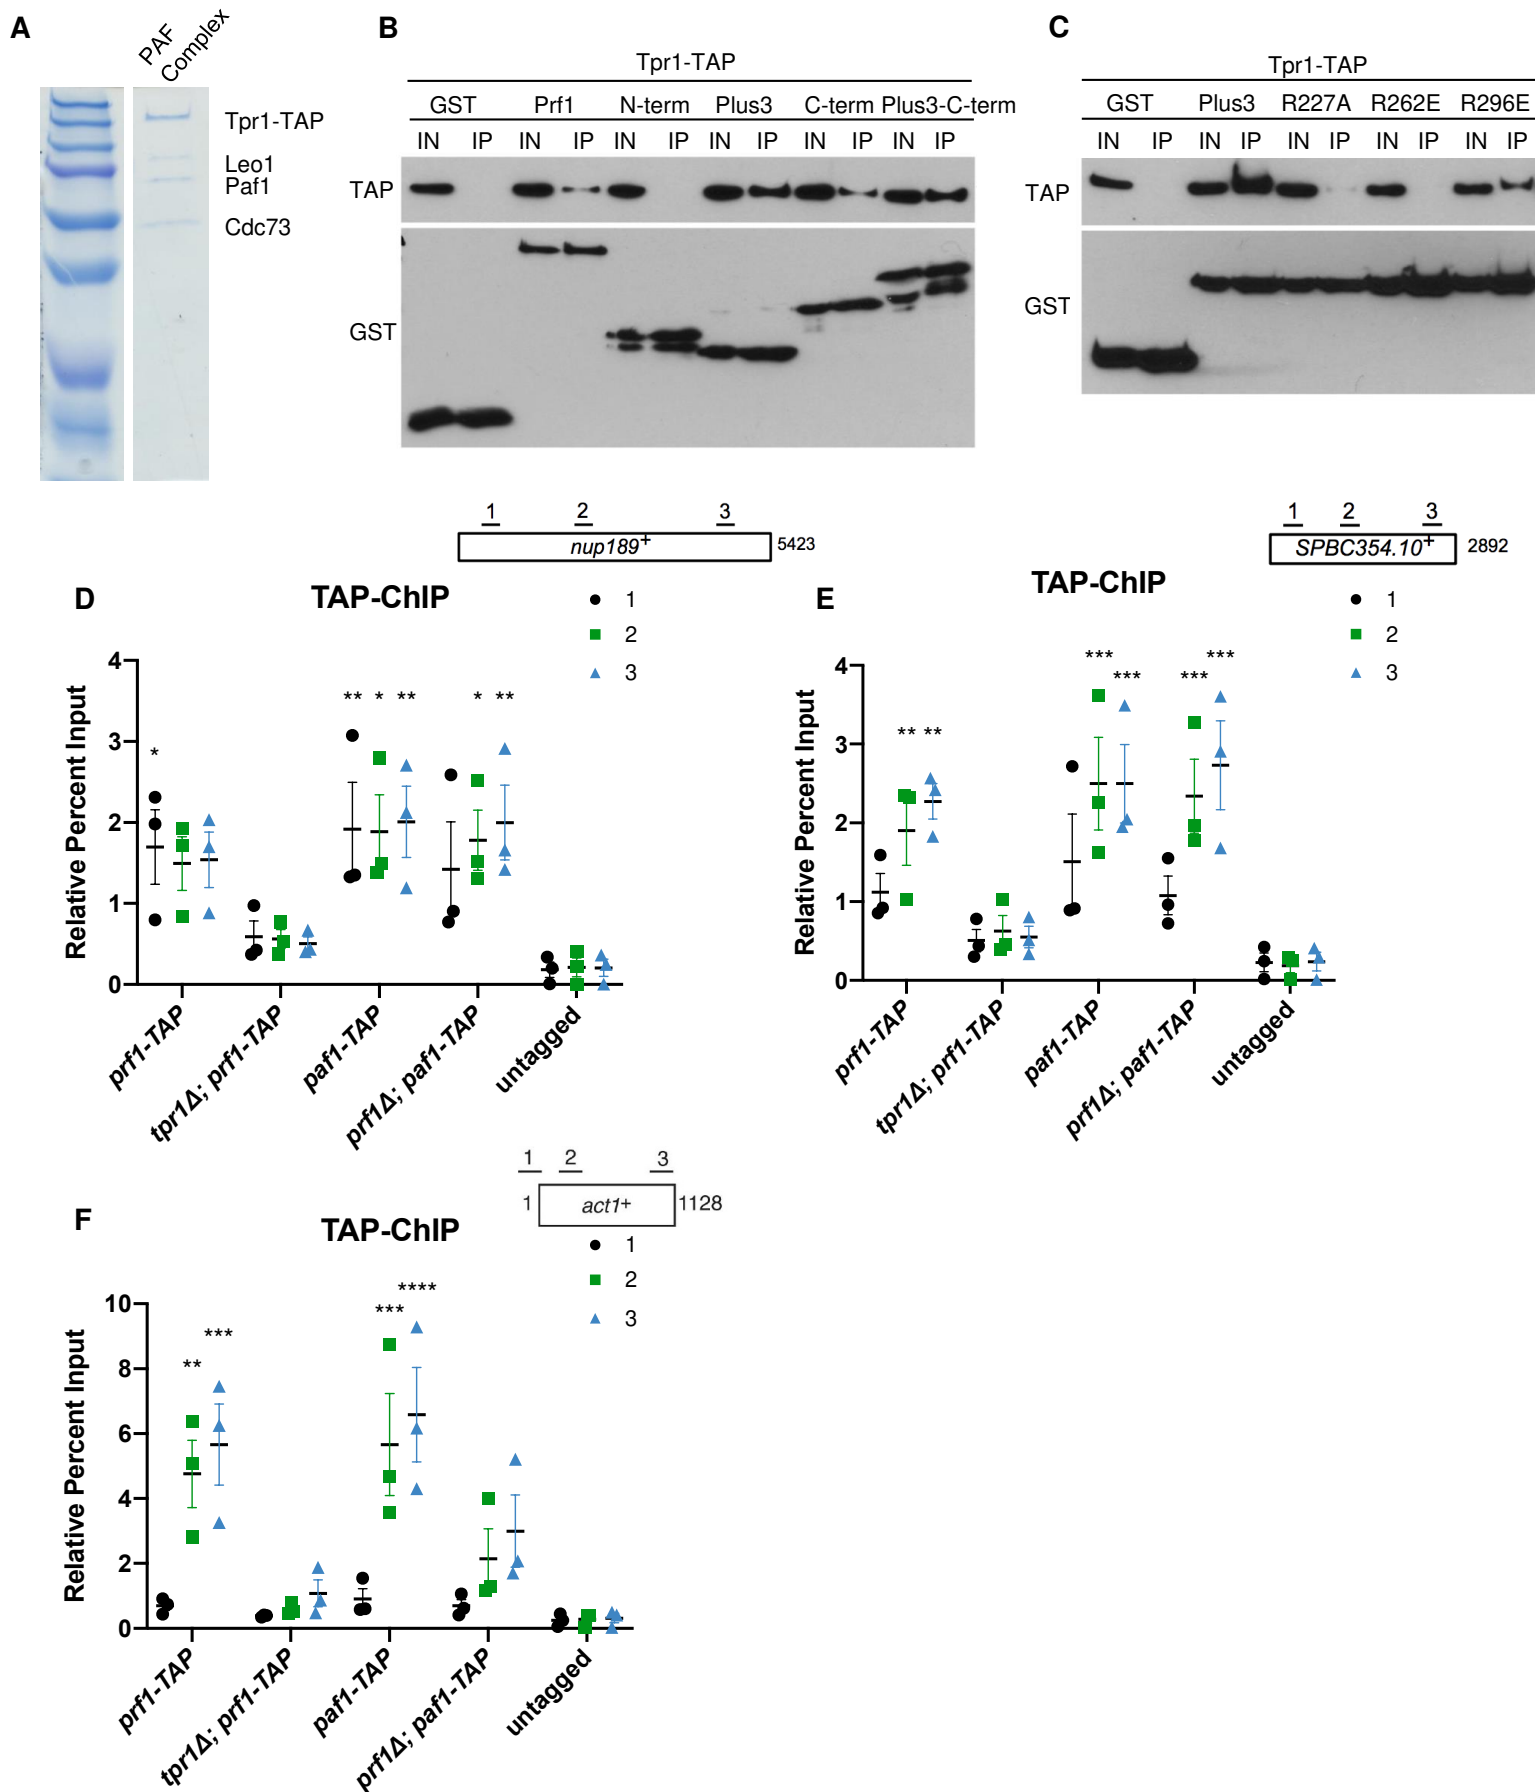

Source: https://www.biorxiv.org/content/biorxiv/early/2020/04/17/2020.04.15.044131.full.pdf
